# Supplementary material for: Mesogenic, optical, and dielectric properties of 5-substituted 2-[12-(4-pentyloxyphenyl)-p-carboran-1-yl] [1,3]dioxanes
Source: Royal Society of Chemistry journal article supplement (doi:10.1039/b608012j), 2006-01-01
Supplement: b608012j.pdf [file b608012j.pdf]

## Electronic Supplementary Information for

### **Mesogenic, Optical, and Dielectric Properties of 5-Substituted 2-[12-(4-pentyloxyphenyl)-p-carboran-1-yl] [1,3]dioxanes**

Takashi Nagamine,<sup>1</sup> Adam Januszko,<sup>2</sup> Piotr Kaszynski,<sup>2\*</sup> Kiminori Ohta,<sup>1</sup> and Yasuyuki Endo<sup>1</sup>

<sup>1</sup> Tohoku Pharmaceutical University, 4-4-1, Komatsushima, Aoba-ku, Sendai 981-8558, Japan

<sup>2</sup> Organic Materials Research Group, Department of Chemistry, Vanderbilt University, Nashville, TN 37235

#### **Table of Content:**

|                                                                           |         |
|---------------------------------------------------------------------------|---------|
| 1. Numerical Analysis of $T_{NI}$ for series <b>2[n]</b>                  | ....S2  |
| 2. Optical Measurements and Order Parameter Calculations                  | ....S2  |
| 3. Dielectric data                                                        | ....S3  |
| 4. Details for Calculations in the Nematic Phase                          | ....S5  |
| 5. Quantum-mechanical computational details                               | ....S5  |
| 6. Dipole moment and polarizability computational results for <b>1[4]</b> | ....S6  |
| 7. Preparative Details                                                    | ....S7  |
| 8. Archive files for HF/6-31G(d) calculations                             | ....S20 |
| 9. References                                                             | ....S30 |

## 1. Numerical Analysis of $T_{NI}$ for series 2[n]

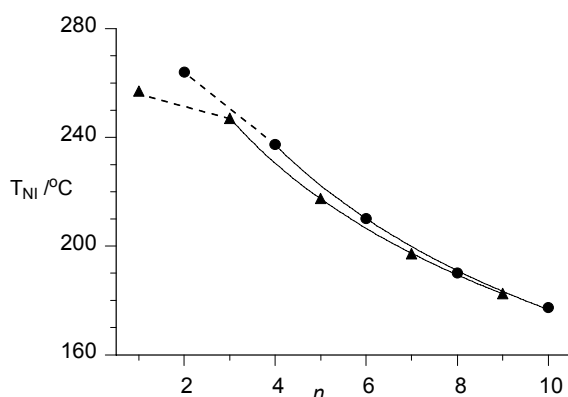

**Fig. S1** Nematic-isotropic transition temperatures  $T_{NI}$  for **2[n]** as a function of the chain length  $n$ . Best fit 2-parameter functions of type 1:  $T_{NI} = 86 + \exp(5.901 - 0.441 \cdot \sqrt{n})$  for odd  $n$  excluding **1[1]**, and  $T_{NI} = 86 + \exp(5.783 - 0.405 \cdot \sqrt{n})$  for even  $n$  excluding **1[2]**;  $r^2 > 0.999$ . Best fit 2-parameter functions of type 2:  $T_{NI} = 89 \cdot (19.26 + n) / (4.72 + n)$ ;  $r^2 > 0.999$ .

## 2. Optical Measurements and Order Parameter Calculations

**Table S1.** Refractive indices of **1[4]** measured at  $\lambda = 589$  nm as a function of temperature.

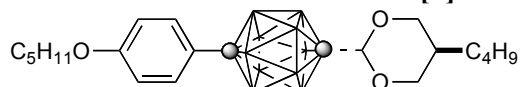

| Temperature / °C | $n_e$  | $n_o$  | $\Delta n$ | $n_{avg}$ |
|------------------|--------|--------|------------|-----------|
| 71.5             | 1.5066 | 1.680  | 0.173      | 1.566     |
| 72.6             | 1.5059 | 1.678  | 0.172      | 1.565     |
| 74.8             | 1.5051 | 1.676  | 0.171      | 1.564     |
| 77.5             | 1.5046 | 1.674  | 0.170      | 1.563     |
| 80.1             | 1.5040 | 1.673  | 0.169      | 1.562     |
| 82.2             | 1.5033 | 1.671  | 0.168      | 1.561     |
| 85.0             | 1.5030 | 1.6705 | 0.168      | 1.561     |
| 86.0             | 1.5024 | 1.6700 | 0.1675     | 1.560     |

Orientational order parameter  $S$  was calculated from equation 1<sup>1</sup>

$$S = \frac{\alpha}{\Delta\alpha} \cdot \frac{n_e^2 - n_o^2}{n_{avg}^2 - 1} \quad \text{Eq 1}$$

or by using the Vuks model (Eq 2).<sup>2</sup>

$$S = \frac{3\varepsilon_0 M_w}{\Delta\alpha N_A d} \cdot \frac{n_e^2 - n_o^2}{n_{avg}^2 + 2} \quad \text{Eq 2}$$

where  $n_{avg}^2 = (n_e^2 + 2n_o^2)/3$ ,  $M_w = 448.6$  g/mol,  $d$  is assumed to be  $1.0$  g/cm<sup>3</sup>, and  $\Delta\alpha$  is computed (*vide infra*).

### 3. Dielectric Data

Dielectric parameters in Table S2 for low concentration solutions of additives **1[4]** to 6-CHBT were obtained from by averaging 5 measurements of each solution in a single cell. Standard deviation of the resulting values  $\leq \pm 0.03$ . Dielectric permittivity values for the host were obtained by averaging results for 3 cells. All measurements were run at  $24$  °C. Error on concentration values  $\sim 1.5\%$

**Table S2.** Dielectric parameters for **1[4]** as a function of concentration. Average of 5 runs in a single cell.

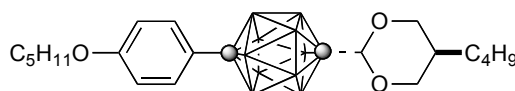

| parameter          | Mole fraction   |                  |                  |                  |
|--------------------|-----------------|------------------|------------------|------------------|
|                    | 0.00 (host)     | 0.055            | 0.107            | 0.138            |
| $V_{TH10}/V$       | $1.55 \pm 0.02$ | $1.56 \pm 0.01$  | $1.57 \pm 0.01$  | $1.62 \pm 0.01$  |
| $\epsilon_{  }$    | $12.0 \pm 0.2$  | $11.65 \pm 0.03$ | $11.14 \pm 0.03$ | $10.99 \pm 0.05$ |
| $\epsilon_{\perp}$ | $4.0 \pm 0.1$   | $4.04 \pm 0.01$  | $4.01 \pm 0.01$  | $3.99 \pm 0.03$  |
| $\Delta\epsilon$   | $8.0 \pm 0.15$  | $7.60 \pm 0.03$  | $7.12 \pm 0.03$  | $7.00 \pm 0.03$  |

Dielectric parameters for **1[4]** were obtained from 3 cells and each was measured 3 times over the temperature range of  $75$ - $105$  °C. The resulting values were averaged and are shown in Table S3. Standard deviation of the resulting values is  $\leq \pm 0.1$ .

**Table S3.** Dielectric parameters for **1[4]** as a function of temperature. Average of 3 runs for 3 cells. Std for  $\epsilon_{||}$  and  $\epsilon_{\perp}$  is  $0.1$ , and for  $\Delta\epsilon$  is  $0.01$ .

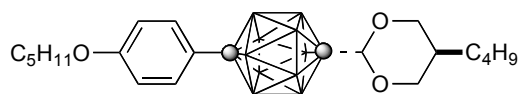

| Temperature<br>°C | $\Delta\epsilon$ | $\epsilon_{\perp}$ | $\epsilon_{  }$ |
|-------------------|------------------|--------------------|-----------------|
| 75                | 0.42             | 3.51               | 3.09            |
| 76                | 0.42             | 3.50               | 3.08            |
| 77                | 0.42             | 3.50               | 3.08            |
| 78                | 0.41             | 3.49               | 3.07            |
| 79                | 0.42             | 3.49               | 3.07            |
| 80                | 0.41             | 3.48               | 3.07            |
| 81                | 0.41             | 3.47               | 3.06            |
| 82                | 0.41             | 3.46               | 3.06            |
| 83                | 0.40             | 3.46               | 3.05            |
| 84                | 0.41             | 3.45               | 3.05            |
| 85                | 0.40             | 3.45               | 3.05            |
| 86                | 0.40             | 3.44               | 3.05            |
| 87                | 0.40             | 3.44               | 3.04            |
| 88                | 0.39             | 3.42               | 3.04            |
| 89                | 0.38             | 3.40               | 3.05            |
| 90                | 0.38             | 3.40               | 3.03            |
| 91                | 0.38             | 3.40               | 3.02            |
| 92                | 0.37             | 3.39               | 3.02            |
| 93                | 0.34             | 3.36               | 3.02            |
| 94                | 0.37             | 3.37               | 3.02            |
| 95                | 0.35             | 3.35               | 3.01            |
| 96                | 0.33             | 3.34               | 3.01            |
| 97                | 0.33             | 3.34               | 3.01            |
| 98                | 0.26             | 3.28               | 3.03            |
| 99                | 0.11             | 3.16               | 3.05            |
| 100               | 0.02             | 3.09               | 3.07            |
| 101               | -0.01            | 3.06               | 3.07            |
| 102               | -0.01            | 3.06               | 3.06            |
| 103               | 0.02             | 3.07               | 3.06            |
| 104               | 0.000            | 3.06               | 3.05            |
| 105               | 0.01             | 3.07               | 3.05            |
| 106               | 0.00             | 3.04               | 3.04            |
| 107               | 0.03             | 3.07               | 3.04            |
| 108               | 0.01             | 3.05               | 3.03            |
| 109               | -0.01            | 3.02               | 3.03            |
| 110               | 0.01             | 3.06               | 3.03            |

#### 4. Details for Calculations in the Nematic Phase

The Equations derived from the Maier-Meier theory used in this work were adopted from literature<sup>3,4</sup> and had the following form:

$$\Delta\varepsilon = \frac{NFh}{\varepsilon_0} \left\{ \Delta\alpha - \frac{F\mu_{eff}^2}{2k_B T} (1 - 3\cos^2\beta) \right\} S$$

$$\varepsilon_{\parallel} = 1 + \frac{NFh}{\varepsilon_0} \left\{ \alpha + \frac{2}{3} \Delta\alpha S + \frac{F\mu_{eff}^2}{3k_B T} \left[ 1 - (1 - 3\cos^2\beta) S \right] \right\}$$

$$\varepsilon_{\perp} = 1 + \frac{NFh}{\varepsilon_0} \left\{ \alpha - \frac{1}{3} \Delta\alpha S + \frac{F\mu_{eff}^2}{3k_B T} \left[ 1 + \frac{1}{2} (1 - 3\cos^2\beta) S \right] \right\}$$

All quantities were in SI units.

• Reaction field factors  $F$  and  $h$  for the pure **1[4]** were calculated using the experimental average permittivity and refractive index. For calculations involving extrapolated dielectric parameters for **1[4]**, reaction field factors  $F$  and  $h$  were calculated for the pure host 6-CHBT using literature<sup>5</sup> values for  $n_{\perp} = 1.5212$  and  $n_{\parallel} = 1.6610$  and experimental average permittivity. Thus, reaction field parameters  $F$  and  $h$  were using the following equations:

$$F = \frac{(2\varepsilon_s + 1)(n^2 + 2)}{3(2\varepsilon_s + n^2)} \quad h = \frac{3\varepsilon_s}{(2\varepsilon_s + 1)}$$

The former is a Dunmur-Toriyama expression for  $F$ .<sup>6</sup>

|             | $\bar{\varphi}$ °C | $\varepsilon_{\text{avg}}$ | $\tilde{n}_{\text{avg}}^2$ | $F$   | $h$   |
|-------------|--------------------|----------------------------|----------------------------|-------|-------|
| <b>1[4]</b> | 85                 | 3.18                       | 2.44                       | 1.237 | 1.296 |
| 6-CHBT      | 24                 | 6.27                       | 2.46                       | 1.342 | 1.289 |

## 5. Quantum-mechanical computational details

Quantum-mechanical calculations were carried out using Gaussian 98<sup>7</sup> suite of programs. Geometry optimizations for unconstrained conformers of **1[4]** with alkyl chains in the most extended forms were undertaken at the HF/6-31G(d) and B3LYP/3-21G levels of theory using default convergence limits.

## 6. Dipole moment and polarizability computational results for **1[4]**

In all these calculations long molecular axes are oriented along the x axes.

Dipole Moments (D) at the HF/6-31G\* level of theory (full geometry optimization)

conformer A

Dipole moment (Debye):

X= -1.5463 Y= 1.5440 Z= -0.9778 Tot= 2.3940

conformer B

Dipole moment (Debye):

X= -1.7656 Y= -0.7244 Z= 0.2921 Tot= 1.9307

conformer C (syn)

Dipole moment (Debye):

X= -1.5956 Y= -0.8343 Z= 1.3418 Tot= 2.2455

conformer C (anti)

Dipole moment (Debye):

X= 1.5436 Y= 1.4551 Z= 0.6326 Tot= 2.2137

conformer D (syn)

Dipole moment (Debye):

X= -1.8197 Y= 1.0532 Z= 0.1678 Tot= 2.1092

conformer D (anti)

Dipole moment (Debye):

X= 1.7613 Y= -0.8804 Z= 0.6423 Tot= 2.0712

conformer E (syn)

Dipole moment (Debye):

X= -1.6915 Y= -1.1599 Z= 1.0725 Tot= 2.3145

conformer E (anti)

Dipole moment (Debye):

X= -1.5986 Y= -1.5259 Z= 0.4719 Tot= 2.2597

conformer F (syn)

Dipole moment (Debye):

X= -1.7397 Y= 0.9756 Z= 0.5976 Tot= 2.0822

conformer F (anti)

Dipole moment (Debye):

X= 1.6572 Y= -1.1476 Z= 0.2133 Tot= 2.0270

Electronic polarizabilities (au) at the B3LYP/3-21G level of theory (full geometry optimization) for selected conformers of **1[4]**

conformer A

Exact polarizability: 495.325 -3.203 264.271 -0.969 -13.939 247.030

conformer B

Exact polarizability: 490.525 -3.808 273.499 1.610 9.954 242.280

conformer C (anti)

Exact polarizability: 495.381 2.107 272.259 0.826 8.426 238.793

conformer D (syn)

Exact polarizability: 488.053 3.043 281.919 -2.343 1.224 235.836

conformer E (anti)

Exact polarizability: 492.909 1.313 276.318 -4.785 0.633 236.187

conformer F (syn)

Exact polarizability: 490.440 3.952 276.147 -4.038 10.508 239.047

## 7. Preparative Details

NMR spectra were obtained at the 270 MHz ( $^1\text{H}$ ) or 67.8 MHz ( $^{13}\text{C}$ ) in  $\text{CDCl}_3$  and referenced to TMS. Elemental analysis was provided by Instrumental Analysis Center for Chemistry, Graduate School of Science, Tohoku University or at Atlantic Microlab, GA. *p*-Carborane was purchased from Katchem s. r. o. (Prague, Czech Republic). Other chemicals were purchased from Aldrich or Tokyo Kasei Ltd.

***trans*-5-Alkyl-2-[12-(4-pentyloxyphenyl)-*p*-carboran-1-yl][1,3]dioxanes (1[n]) and *trans*-5-Aryl-2-[12-(4-pentyloxyphenyl)-*p*-carboran-1-yl][1,3]dioxanes 2[n] and 3[n].**  
**General procedure.** A solution of 12-(4-pentyloxyphenyl)-*p*-carborane-1-carbaldehyde (**4**, 500 mg, 1.50 mmol), appropriate 2-alkyl-1,3-propanediol (**5[n]**, 2.0 equiv.) or 2-aryl-1,3-propanediol (**6[n]** or **7[n]**, 1.3 equiv.) and a catalytic amount of *p*-toluenesulfonic acid in toluene or xylene (5 mL) was refluxed for 18 hr using Dean-Stark water trap. The mixture was poured into saturated aqueous  $\text{NaHCO}_3$  and extracted with AcOEt. The organic layer was washed with brine, dried ( $\text{MgSO}_4$ ) and concentrated under reduced pressure. The crude product was purified by silica gel flash column chromatography (**5[n]**: *n*-hexane/benzene, 8:1; **6[n]** and **7[n]**: *n*-hexane/ $\text{Et}_2\text{O}$ , 15:1) and subsequently recrystallized to give colorless crystalline product.

***trans*-5-Methyl-2-[12-(4-pentyloxyphenyl)-*p*-carboran-1-yl][1,3]dioxane (1[1]).**

Yield 36%, rods (*n*-hexane): mp 137-139 °C; <sup>1</sup>H NMR δ (ppm) 0.64 (d, *J* = 6.8 Hz, 3 H), 0.90 (t, *J* = 7.2 Hz, 3 H), 1.27-1.45 (m, 4 H), 1.50-3.75 (brm, 10 H), 1.73 (quint., *J* = 7.0 Hz, 2 H), 1.90-2.05 (m, 1 H), 3.16 (t, *J* = 11.5 Hz, 2 H), 3.87 (t, *J* = 6.6 Hz, 2 H), 3.98 (dd, *J* = 4.9 Hz, 11.9 Hz, 2 H), 4.18 (s, 1 H), 6.65 (d, *J* = 8.9 Hz, 2 H), 7.09 (d, *J* = 8.9 Hz, 2 H). Anal. Calcd. for C<sub>18</sub>H<sub>34</sub>B<sub>10</sub>O<sub>3</sub>: C, 53.17; H, 8.43. Found: C, 53.35; H, 8.44.

***trans*-5-Ethyl-2-[12-(4-pentyloxyphenyl)-*p*-carboran-1-yl][1,3]dioxane (1[2]).**

Yield 41%, prisms (*n*-hexane): mp 116-117 °C; <sup>1</sup>H NMR δ (ppm) 0.85 (t, *J* = 7.4 Hz, 3H), 0.91 (t, *J* = 7.0 Hz, 3 H), 1.02 (quint., *J* = 7.3 Hz, 2H), 1.28-1.46 (m, 4H), 1.50-3.75 (brm, 10H), 1.74 (quint., *J* = 7.0 Hz, 2 H), 1.81 (ttt, *J* = 4.5 Hz, 6.8 Hz, 11.3 Hz, 1H), 3.20 (t, *J* = 11.5 Hz, 2H), 3.87 (t, *J* = 6.5 Hz, 2H), 4.06 (dd, *J* = 4.6 Hz, 11.9 Hz, 2H), 4.18 (s, 1H), 6.66 (d, *J* = 8.9 Hz, 2H), 7.10 (d, *J* = 9.2 Hz, 2H). Anal. Calcd. for C<sub>19</sub>H<sub>36</sub>B<sub>10</sub>O<sub>3</sub>: C, 54.26; H, 8.63. Found: C, 54.52; H, 8.90.

***trans*-5-Propyl-2-[12-(4-pentyloxyphenyl)-*p*-carboran-1-yl][1,3]dioxane (1[3]).**

Yield 34%, prisms (*n*-hexane): mp 86-87 °C; <sup>1</sup>H NMR δ (ppm) 0.86 (t, *J* = 7.2 Hz, 3H), 0.91 (t, *J* = 7.0 Hz, 3H), 0.91 (sext, *J* = 7.6 Hz, 2H), 1.22 (quint., *J* = 7.4 Hz, 2H), 1.30-1.44 (m, 4H), 1.50-3.75 (brm, 10H), 1.73 (quint., *J* = 6.9 Hz, 2H), 1.90 (ttt, *J* = 4.8 Hz, 6.8 Hz, 11.3 Hz, 1H), 3.19 (t, *J* = 11.6 Hz, 2H), 3.87 (t, *J* = 6.5 Hz, 2H), 4.03 (dd, *J* = 4.6 Hz, 11.9 Hz, 2H), 4.18 (s, 1 H), 6.65 (d, *J* = 8.9 Hz, 2H), 7.09 (d, *J* = 8.9 Hz, 2H). Anal. Calcd. for C<sub>20</sub>H<sub>38</sub>B<sub>10</sub>O<sub>3</sub>: C, 55.27; H, 8.81. Found: C, 55.38; H, 8.94.

***trans*-5-Butyl-2-[12-(4-pentyloxyphenyl)-*p*-carboran-1-yl][1,3]dioxane (1[4]).**

Yield 45%, cubes (*n*-hexane/2-propanol): mp 68 °C; <sup>1</sup>H NMR δ 0.85-0.99 (m, 2H), 0.85 (t, *J* = 6.9 Hz, 3H), 0.90 (t, *J* = 6.8 Hz, 3H), 1.12-1.42 (m, 8H), 1.50-3.75 (brm, 10 H), 1.73 (quint., *J* = 7.0 Hz, 2H), 1.87 (ttt, *J* = 4.7 Hz, 6.8 Hz, 11.4 Hz, 1H), 3.18 (t, *J* = 11.4 Hz, 2H), 3.86 (t, *J* = 6.5 Hz, 2H), 4.03 (dd, *J* = 4.7 Hz, 11.8 Hz, 2H), 4.17 (s, 1H), 6.34 (d, *J* = 8.9 Hz, 2H), 7.09 (d, *J* = 8.6 Hz, 2H); MS: *m/z* = 448 (M<sup>+</sup>), 143 (100 %); HRMS: calcd. for C<sub>21</sub>H<sub>40</sub>B<sub>10</sub>O<sub>3</sub>: 448.3980. found. 448.3993. Anal. Calcd. for C<sub>21</sub>H<sub>40</sub>B<sub>10</sub>O<sub>3</sub>: C, 56.22; H, 8.99. Found: C, 55.96; H, 9.03.

***trans*-5-Pentyl-2-[12-(4-pentyloxyphenyl)-*p*-carboran-1-yl][1,3]dioxane (1[5]).**

Yield 51%, cubes (*n*-hexane/2-propanol): mp 89-91 °C; <sup>1</sup>H NMR δ 0.85-0.99 (m, 2H), 0.86 (t, *J* = 6.7 Hz, 3H), 0.90 (t, *J* = 6.7 Hz, 3H), 1.16-1.43 (m, 10H), 1.50-3.75 (brm, 10H), 1.73 (quint., *J* = 7.0 Hz, 2H), 1.87 (ttt, *J* = 4.5 Hz, 6.7 Hz, 11.3 Hz, 1H), 3.18 (t, *J* = 11.6 Hz, 2H), 3.86 (t, *J* = 6.5



Hz, 2H), 4.03 (dd,  $J = 4.6$  Hz, 11.9 Hz, 2H), 4.17 (s, 1 H), 6.65 (d,  $J = 9.0$  Hz, 2H), 7.09 (d,  $J = 9.0$  Hz, 2H); MS:  $m/z = 462$  ( $M^+$ ), 69 (100 %); HRMS: calcd. for  $C_{22}H_{42}B_{10}O_3$ : 462.4137. found. 462.4167. Anal. Calcd. for  $C_{22}H_{42}B_{10}O_3$ : C, 57.11; H, 9.15. Found: C, 57.20; H, 9.17.

***trans*-5-Hexyl-2-[12-(4-pentyloxyphenyl)-*p*-carboran-1-yl][1,3]dioxane (1[6]).** Yield 31%, needles (*n*-hexane/2-propanol): mp 62 °C;  $^1H$  NMR  $\delta$  0.85-0.99 (m, 2H), 0.86 (t,  $J = 6.8$  Hz, 3H), 0.90 (t,  $J = 7.0$  Hz, 3H), 1.15-1.44 (m, 12H), 1.50-3.75 (brm, 10H), 1.73 (quint.,  $J = 6.9$  Hz, 2H), 1.87 (ttt,  $J = 4.7$  Hz, 6.6 Hz, 11.3 Hz, 1H), 3.18 (t,  $J = 11.5$  Hz, 2H), 3.86 (t,  $J = 6.6$  Hz, 2H), 4.03 (dd,  $J = 4.7$  Hz, 11.8 Hz, 2H), 4.17 (s, 1H), 6.65 (d,  $J = 8.9$  Hz, 2H), 7.09 (d,  $J = 8.9$  Hz, 2H); MS:  $m/z = 476$  ( $M^+$ ), 69 (100 %); HRMS: calcd. for  $C_{23}H_{44}B_{10}O_3$ : 476.4294. found. 476.4299. Anal. Calcd. for  $C_{23}H_{44}B_{10}O_3$ : C, 57.95; H, 9.30. Found: C, 58.07; H, 9.40.

***trans*-5-Heptyl-2-[12-(4-pentyloxyphenyl)-*p*-carboran-1-yl][1,3]dioxane (1[7]).** Yield 42%, needles (*n*-hexane/2-propanol): mp 68-69 °C;  $^1H$  NMR  $\delta$  0.85-0.99 (m, 2 H), 0.87 (t,  $J = 6.8$  Hz, 3H), 0.90 (t,  $J = 7.2$  Hz, 3H), 1.15-1.45 (m, 14H), 1.50-3.75 (brm, 10H), 1.73 (quint.,  $J = 7.0$  Hz, 2H), 1.87 (ttt,  $J = 4.7$  Hz, 6.5 Hz, 11.3 Hz, 1H), 3.18 (t,  $J = 11.6$  Hz, 2H), 3.87 (t,  $J = 6.6$  Hz, 2H), 4.03 (dd,  $J = 4.7$  Hz, 11.9 Hz, 2 H), 4.17 (s, 1H), 6.65 (d,  $J = 9.0$  Hz, 2H), 7.09 (d,  $J = 9.0$  Hz, 2H); MS:  $m/z = 490$  ( $M^+$ ), 185 (100 %); HRMS: calcd. for  $C_{24}H_{46}B_{10}O_3$ : 490.4456. found. 490.4445. Anal. Calcd. for  $C_{24}H_{46}B_{10}O_3$ : C, 58.74; H, 9.45. Found: C, 58.83; H, 9.55.

***trans*-5-Octyl-2-[12-(4-pentyloxyphenyl)-*p*-carboran-1-yl][1,3]dioxane (1[8]).** Yield 45%, cubes (*n*-hexane/2-propanol): mp 58 °C;  $^1H$  NMR  $\delta$  0.85-0.99 (m, 2H), 0.87 (t,  $J = 6.8$  Hz, 3H), 0.90 (t,  $J = 7.1$  Hz, 3H), 1.15-1.45 (m, 16H), 1.50-3.75 (brm, 10H), 1.73 (quint.,  $J = 7.1$  Hz, 2 H), 1.87 (ttt,  $J = 4.7$  Hz, 6.7 Hz, 11.3 Hz, 1H), 3.18 (t,  $J = 11.5$  Hz, 2H), 3.86 (t,  $J = 6.5$  Hz, 2 H), 4.03 (dd,  $J = 4.8$  Hz, 11.8 Hz, 2H), 4.17 (s, 1H), 6.65 (d,  $J = 9.0$  Hz, 2H), 7.09 (d,  $J = 8.9$  Hz, 2H); MS:  $m/z = 504$  ( $M^+$ ), 199 (100 %); HRMS: calcd. for  $C_{25}H_{48}B_{10}O_3$ : 504.4607; found. 504.4605. Anal. Calcd. for  $C_{25}H_{48}B_{10}O_3$ : C, 59.49; H, 9.59. Found: C, 59.70; H, 9.72.

***trans*-5-Nonyl-2-[12-(4-pentyloxyphenyl)-*p*-carboran-1-yl][1,3]dioxane (1[9]).** Yield 41%, prisms (*n*-hexane/2-propanol): mp 53 °C;  $^1H$  NMR  $\delta$  0.85-0.99 (m, 2 H), 0.87 (t,  $J = 6.8$  Hz, 3 H), 0.90 (t,  $J = 6.9$  Hz, 3H), 1.15-1.45 (m, 18H), 1.50-3.75 (brm, 10 H), 1.73 (quint.,  $J = 6.9$  Hz, 2H), 1.87 (ttt,  $J = 4.6$  Hz, 6.7 Hz, 11.3 Hz, 1H), 3.18 (t,  $J = 11.5$  Hz, 2 H), 3.86 (t,  $J = 6.5$  Hz, 2 H), 4.03 (dd,  $J = 4.7$  Hz, 11.8 Hz, 2H), 4.17 (s, 1H), 6.65 (d,  $J = 8.9$  Hz, 2H), 7.09 (d,  $J = 9.0$  Hz, 2H); MS:  $m/z = 518$  ( $M^+$ ), 518 (100 %); HRMS: calcd. for  $C_{26}H_{50}B_{10}O_3$ : 518.4763. found. 518.4745. Anal. Calcd. for  $C_{26}H_{50}B_{10}O_3$ : C, 60.20; H, 9.71. Found: C, 60.23; H, 9.72.

***trans*-5-Decyl-2-[12-(4-pentyloxyphenyl)-*p*-carboran-1-yl][1,3]dioxane (1[10]).** Yield 38%, cubes (*n*-hexane/2-propanol): mp 50-52 °C; <sup>1</sup>H NMR δ 0.86-0.99 (m, 2H), 0.88 (t, *J* = 6.9 Hz, 3H), 0.90 (t, *J* = 7.1 Hz, 3H), 1.15-1.45 (m, 20H), 1.50-3.75 (brm, 10H), 1.73 (quint., *J* = 6.8 Hz, 2H), 1.87 (ttt, *J* = 4.6 Hz, 6.7 Hz, 11.3 Hz, 1H), 3.18 (t, *J* = 11.5 Hz, 2H), 3.87 (t, *J* = 6.5 Hz, 2H), 4.03 (dd, *J* = 4.7 Hz, 11.9 Hz, 2H), 4.17 (s, 1H), 6.65 (d, *J* = 9.1 Hz, 2H), 7.09 (d, *J* = 8.9 Hz, 2H); MS: *m/z* = 532 (M<sup>+</sup>), 69, 43 (100 %); HRMS: calcd. for C<sub>27</sub>H<sub>52</sub>B<sub>10</sub>O<sub>3</sub>: 532.4919. found. 532.4909. Anal. Calcd. for C<sub>27</sub>H<sub>52</sub>B<sub>10</sub>O<sub>3</sub>: C, 60.87; H, 9.84. Found: C, 61.10; H, 10.01.

***trans*-5-(4-Methoxyphenyl)-2-[12-(4-pentyloxyphenyl)-*p*-carboran-1-yl][1,3]-dioxane (2[1]).** : Yield 47%, needles (*n*-hexane): mp 128 °C; <sup>1</sup>H NMR δ 0.91 (t, *J* = 7.0 Hz, 3H), 1.25-1.45 (m, 4H), 1.50-3.75 (brm, 10H), 1.73 (quint., *J* = 6.8 Hz, 2H), 3.06 (tt, *J* = 4.5, 11.3 Hz, 1H), 3.65 (t, *J* = 11.8 Hz, 2H), 3.77 (s, 3H), 3.87 (t, *J* = 6.6 Hz, 2H), 4.12 (dd, *J* = 4.6 Hz, 11.9 Hz, 2H), 4.34 (s, 1H), 6.66 (d, *J* = 8.9 Hz, 2H), 6.84 (d, *J* = 8.6 Hz, 2H), 7.02 (d, *J* = 8.6 Hz, 2H), 7.10 (d, *J* = 8.6 Hz, 2H); <sup>13</sup>C NMR δ 14.0, 22.4, 28.1, 28.9, 39.4, 55.3, 68.0, 72.5, 80.0, 84.6, 98.6, 113.7, 114.3, 128.2, 128.6, 128.7, 128.8, 159.0, 159.2; MS: *m/z* = 498 (M<sup>+</sup>), 43, 134 (100 %); HRMS: calcd for C<sub>24</sub>H<sub>38</sub>B<sub>10</sub>O<sub>4</sub>: 498.3773; found 498.3401. Anal. Calcd. for C<sub>24</sub>H<sub>38</sub>B<sub>10</sub>O<sub>4</sub>: C, 57.81; H, 7.68. Found: C, 57.65; H, 7.72.

***trans*-5-(4-Ethoxyphenyl)-2-[12-(4-pentyloxyphenyl)-*p*-carboran-1-yl][1,3]-dioxane (2[2]).** Yield 72%, needles (*n*-hexane): mp 171 °C; <sup>1</sup>H NMR δ 0.91 (t, *J* = 7.0 Hz, 3H), 1.25-1.45 (m, 4H), 1.39 (t, *J* = 6.9 Hz, 3H), 1.50-3.75 (brm, 10H), 1.73 (quint., *J* = 6.8 Hz, 2H), 3.05 (tt, *J* = 4.5, 11.3 Hz, 1H), 3.64 (t, *J* = 11.6 Hz, 2H), 3.87 (t, *J* = 6.5 Hz, 2H), 3.99 (q, *J* = 7.0 Hz, 2H), 4.12 (dd, *J* = 4.7 Hz, 12.0 Hz, 2H), 4.34 (s, 1H), 6.66 (d, *J* = 8.9 Hz, 2H), 6.82 (d, *J* = 8.6 Hz, 2H), 7.00 (d, *J* = 8.6 Hz, 2H), 7.10 (d, *J* = 8.9 Hz, 2H); MS: *m/z* = 512 (M<sup>+</sup>), 43, 120, 148 (100 %); HRMS: calcd for C<sub>25</sub>H<sub>40</sub>B<sub>10</sub>O<sub>4</sub>: 512.3929; found 512.3918. Anal. Calcd. for C<sub>25</sub>H<sub>40</sub>B<sub>10</sub>O<sub>4</sub>: C, 58.57; H, 7.86; Found: C, 58.68; H, 7.81.

***trans*-5-(4-Propoxyphenyl)-2-[12-(4-pentyloxyphenyl)-*p*-carboran-1-yl][1,3]-dioxane (2[3]).** Yield 72%, needles (*n*-hexane): mp 161 °C; <sup>1</sup>H NMR δ 0.91 (t, *J* = 7.0 Hz, 3H), 1.01 (t, *J* = 7.4 Hz, 3H), 1.25-1.45 (m, 4H), 1.50-3.75 (brm, 10H), 1.73 (quint., *J* = 6.8 Hz, 2H), 1.75 (sext., *J* = 7.0 Hz, 2H), 3.05 (tt, *J* = 4.4, 11.3 Hz, 1H), 3.64 (t, *J* = 11.6 Hz, 2H), 3.87 (t, *J* = 6.5 Hz, 4H), 4.12 (dd, *J* = 4.6 Hz, 11.9 Hz, 2H), 4.34 (s, 1H), 6.66 (d, *J* = 8.6 Hz, 2H), 6.82 (d, *J* = 8.4 Hz, 2H), 7.01 (d, *J* = 8.6 Hz, 2H), 7.10 (d, *J* = 8.6 Hz, 2H); MS: *m/z* = 526 (M<sup>+</sup>), 43, 120,

162 (100 %); HRMS: calcd for C<sub>26</sub>H<sub>42</sub>B<sub>10</sub>O<sub>4</sub>: 526.4086; found 526.4097. Anal. Calcd. for C<sub>26</sub>H<sub>42</sub>B<sub>10</sub>O<sub>4</sub>: C, 59.29; H, 8.04; Found: C, 59.45; H, 8.09.

***trans*-5-(4-Butoxyphenyl)-2-[12-(4-pentyloxyphenyl)-*p*-carboran-1-yl][1,3]-dioxane (2[4]).** Yield 34%, needles (*n*-hexane): mp 139-140 °C; <sup>1</sup>H NMR δ 0.91 (t, *J* = 7.0 Hz, 3H), 0.96 (t, *J* = 7.4 Hz, 3H), 1.25-1.45 (m, 4H), 1.50-3.75 (brm, 10H), 1.47 (sext., *J* = 7.5 Hz, 2H), 1.73 (quint., *J* = 6.2 Hz, 2H), 1.74 (quint., *J* = 6.8 Hz, 2H), 3.05 (tt, *J* = 4.6, 11.3 Hz, 1H), 3.64 (t, *J* = 11.6 Hz, 2H), 3.87 (t, *J* = 6.2 Hz, 2H), 3.92 (t, *J* = 6.5 Hz, 2H), 4.12 (dd, *J* = 4.7 Hz, 11.7 Hz, 2H), 4.34 (s, 1H), 6.66 (d, *J* = 8.9 Hz, 2H), 6.82 (d, *J* = 8.4 Hz, 2H), 7.00 (d, *J* = 8.9 Hz, 2H), 7.10 (d, *J* = 8.9 Hz, 2H); MS: *m/z* = 540 (M<sup>+</sup>), 43, 120, 176 (100 %); HRMS: calcd for C<sub>27</sub>H<sub>44</sub>B<sub>10</sub>O<sub>4</sub>: 540.4243; found 540.4239. Anal. Calcd. for C<sub>27</sub>H<sub>44</sub>B<sub>10</sub>O<sub>4</sub>: C, 59.97; H, 8.20. Found: C, 60.15; H, 8.24.

***trans*-5-(4-Pentyloxyphenyl)-2-[12-(4-pentyloxyphenyl)-*p*-carboran-1-yl][1,3]-dioxane (2[5]).** Yield 42%, needles (*n*-hexane): mp 144 °C; <sup>1</sup>H NMR δ 0.91 (t, *J* = 6.9 Hz, 3H), 0.92 (t, *J* = 6.6 Hz, 3H), 1.25-1.45 (m, 8H), 1.50-3.75 (brm, 10H), 1.68-1.82 (m, 4H), 3.05 (tt, 4.5, 11.6 Hz, 1H), 3.64 (t, *J* = 11.8 Hz, 2H), 3.87 (t, *J* = 6.5 Hz, 2H), 3.90 (t, *J* = 6.6 Hz, 2H), 4.11 (dd, *J* = 4.7 Hz, 11.7 Hz, 2H), 4.34 (s, 1 H), 6.66 (d, *J* = 8.9 Hz, 2H), 6.82 (d, *J* = 8.6 Hz, 2H), 7.00 (d, *J* = 8.6 Hz, 2H), 7.10 (d, *J* = 8.9 Hz, 2H); <sup>13</sup>C NMR δ 14.0, 22.4, 28.09, 28.12, 28.8, 28.9, 39.3, 67.85, 67.89, 72.4, 79.9, 84.5, 113.5, 114.6, 128.0, 128.3, 128.4, 158.3, 158.9; MS: *m/z* = 554 (M<sup>+</sup>), 43, 120, 190 (100 %); HRMS: calcd. for C<sub>28</sub>H<sub>46</sub>B<sub>10</sub>O<sub>4</sub>: 554.4399; found: 554.4401. Anal. Calcd. for C<sub>28</sub>H<sub>46</sub>B<sub>10</sub>O<sub>4</sub>: C, 60.62; H, 8.36. Found: C, 60.59; H, 8.19.

***trans*-5-(4-Hexyloxyphenyl)-2-[12-(4-pentyloxyphenyl)-*p*-carboran-1-yl][1,3]-dioxane (2[6]).** Yield 59%, needles (*n*-hexane): mp 145 °C; <sup>1</sup>H NMR δ 0.89 (t, *J* = 6.5 Hz, 3H), 0.91 (t, *J* = 6.8 Hz, 3H), 1.25-1.45 (m, 10H), 1.50-3.75 (brm, 10H), 1.65-1.82 (m, 4H), 3.05 (tt, 4.7, 11.5 Hz, 1H), 3.64 (t, *J* = 11.6 Hz, 2H), 3.87 (t, *J* = 6.8 Hz, 2H), 3.90 (t, *J* = 6.5 Hz, 2H), 4.11 (dd, *J* = 4.7 Hz, 11.7 Hz, 2H), 4.34 (s, 1H), 6.65 (d, *J* = 8.9 Hz, 2H), 6.82 (d, *J* = 8.9 Hz, 2H), 7.00 (d, *J* = 8.9 Hz, 2H), 7.10 (d, *J* = 9.2 Hz, 2H); <sup>13</sup>C NMR δ 14.08, 14.10, 22.5, 22.6, 25.8, 28.2, 28.9, 29.2, 31.6, 39.4, 67.9, 68.0, 72.5, 80.0, 84.5, 98.5, 113.6, 114.7, 128.0, 128.4, 128.5, 158.3, 159.0; MS: *m/z* = 568 (M<sup>+</sup>), 43, 120 (100 %); HRMS: calcd. for C<sub>29</sub>H<sub>48</sub>B<sub>10</sub>O<sub>4</sub>: 568.4556; found: 568.4573. Anal. calcd. for C<sub>29</sub>H<sub>48</sub>B<sub>10</sub>O<sub>4</sub>: C, 61.24; H, 8.51. Found: C, 61.38; H, 8.52.

***trans*-5-(4-Heptyloxyphenyl)-2-[12-(4-pentyloxyphenyl)-*p*-carboran-1-yl][1,3]-dioxane (2[7]).** Yield 56%, needles (*n*-hexane): mp 146 °C; <sup>1</sup>H NMR δ 0.88 (t, *J* = 6.5 Hz, 3H), 0.91 (t, *J* = 6.9 Hz, 3H), 1.20-1.50 (m, 12H), 1.50-3.75 (brm, 10H), 1.65-1.82 (m, 4H), 3.05 (tt, 4.8, 11.2 Hz, 1H), 3.64 (t, *J* = 11.0 Hz, 2H), 3.87 (t, *J* = 7.2 Hz, 2H), 3.90 (t, *J* = 7.4 Hz, 2H), 4.11 (dd, *J* = 4.3 Hz, 11.0 Hz, 2H), 4.34 (s, 1H), 6.65 (d, *J* = 8.9 Hz, 2H), 6.81 (d, *J* = 8.7 Hz, 2H), 7.00 (d, *J* = 8.7 Hz, 2H), 7.10 (d, *J* = 8.9 Hz, 2H); <sup>13</sup>C NMR δ 159.0, 158.4, 128.6, 128.4, 128.1, 114.7, 113.6, 98.6, 84.6, 80.0, 72.5, 68.0, 67.9, 39.5, 31.8, 29.3, 29.1, 28.9, 28.2, 26.1, 22.7, 22.5, 14.2, 14.1; MS: *m/z* = 582 (M<sup>+</sup>), 120, 218 (100 %); HRMS: calcd for C<sub>30</sub>H<sub>50</sub>O<sub>4</sub>: 582.4713; found 582.4718. Anal. Calcd. for C<sub>30</sub>H<sub>50</sub>B<sub>10</sub>O<sub>4</sub>: C, 61.82; H, 8.65. Found: C, 61.98; H, 8.66.

***trans*-5-(4-Octyloxyphenyl)-2-[12-(4-pentyloxyphenyl)-*p*-carboran-1-yl][1,3]-dioxane (2[8]).** Yield 42%, needles (*n*-hexane): mp 124-125 °C; <sup>1</sup>H NMR δ 0.88 (t, *J* = 7.0 Hz, 3H), 0.91 (t, *J* = 7.0 Hz, 3H), 1.25-1.45 (m, 14H), 1.50-3.75 (brm, 10H), 1.73 (quint., *J* = 6.9 Hz, 2H), 1.75 (quint., *J* = 6.5 Hz, 2H), 3.05 (tt, *J* = 4.5, 11.4 Hz, 1H), 3.64 (t, *J* = 11.8 Hz, 2H), 3.87 (t, *J* = 6.6 Hz, 2H), 3.90 (t, *J* = 6.6 Hz, 2H), 4.11 (dd, *J* = 4.2 Hz, 11.6 Hz, 2H), 4.34 (s, 1H), 6.66 (d, *J* = 8.9 Hz, 2H), 6.82 (d, *J* = 8.6 Hz, 2H), 7.00 (d, *J* = 8.6 Hz, 2H), 7.10 (d, *J* = 8.9 Hz, 2H); MS: *m/z* = 597 (M<sup>+</sup>), 43, 120 (100 %); HRMS: calcd for C<sub>31</sub>H<sub>52</sub>B<sub>10</sub>O<sub>4</sub>: 596.4869; found 596.4906. Anal. Calcd. for C<sub>31</sub>H<sub>52</sub>B<sub>10</sub>O<sub>4</sub>: C, 62.38; H, 8.78. Found: C, 62.56; H, 8.76.

***trans*-5-(4-Nonyloxyphenyl)-2-[12-(4-pentyloxyphenyl)-*p*-carboran-1-yl][1,3]-dioxane (2[9]).** Yield 49%, needles (*n*-hexane); mp 124-126 °C; <sup>1</sup>H NMR δ 0.88 (t, *J* = 7.0 Hz, 3H), 0.91 (t, *J* = 7.0 Hz, 3H), 1.25-1.45 (m, 16H), 1.50-3.75 (brm, 10H), 1.65-1.82 (m, 4H), 3.05 (tt, *J* = 4.6, 11.3 Hz, 1H), 3.64 (t, *J* = 11.7 Hz, 2H), 3.87 (t, *J* = 6.6 Hz, 2H), 3.90 (t, *J* = 6.5 Hz, 2H), 4.11 (dd, *J* = 5.0 Hz, 11.7 Hz, 2H), 4.34 (s, 1H), 6.66 (d, *J* = 8.9 Hz, 2H), 6.82 (d, *J* = 8.6 Hz, 2H), 7.00 (d, *J* = 8.6 Hz, 2H), 7.10 (d, *J* = 8.6 Hz, 2H); MS: *m/z* = 611 (M<sup>+</sup>), 43, 120, 246 (100 %). Anal. Calcd. for C<sub>32</sub>H<sub>54</sub>B<sub>10</sub>O<sub>4</sub>: C, 62.92; H, 8.91. Found: C, 62.93; H, 8.92.

***trans*-5-(4-Decyloxyphenyl)-2-[12-(4-pentyloxyphenyl)-*p*-carboran-1-yl][1,3]-dioxane (2[10]).** Yield 45%, needles (*n*-hexane): mp 125-126 °C; <sup>1</sup>H NMR δ 0.88 (t, *J* = 7.0 Hz, 3H), 0.91 (t, *J* = 7.0 Hz, 3H), 1.25-1.45 (m, 18H), 1.50-3.75 (brm, 10H), 1.65-1.82 (m, 4H), 3.05 (tt, *J* = 4.7, 11.5 Hz, 1H), 3.64 (t, *J* = 11.6 Hz, 2H), 3.87 (t, *J* = 6.5 Hz, 2H), 3.90 (t, *J* = 6.5 Hz, 2H), 4.12 (dd, *J* = 4.7 Hz, 12.0 Hz, 2H), 4.34 (s, 1H), 6.66 (d, *J* = 8.9 Hz, 2H), 6.82 (d, *J* = 8.6 Hz, 2H), 6.99 (d, *J* = 8.6 Hz, 2H), 7.10 (d, *J* = 9.2 Hz, 2H); MS: *m/z* = 625 (M<sup>+</sup>), 43, 69, 120 (100

%); HRMS: calcd for C<sub>33</sub>H<sub>56</sub>B<sub>10</sub>O<sub>4</sub>: 624.5182; found 624.5218. Anal. Calcd. for C<sub>33</sub>H<sub>56</sub>B<sub>10</sub>O<sub>4</sub>: C, 63.43; H, 9.03. Found: C, 63.62; H, 9.06.

***trans*-5-(4-pentylphenyl)-2-[12-(4-pentyloxyphenyl)-*p*-carboran-1-yl][1,3]dioxane**

**(3[5])**. Yield 51%, needles (*n*-hexane): mp 144 °C; <sup>1</sup>H NMR δ 0.88 (t, *J* = 6.8 Hz, 3H), 0.91 (t, *J* = 7.0 Hz, 3H), 1.29-1.42 (m, 8H), 1.50-3.75 (brm, 10H), 1.57 (quint., *J* = 7.7 Hz, 2H), 1.73 (quint., *J* = 6.8 Hz, 2H), 2.55 (t, *J* = 7.7 Hz, 2H), 3.08 (tt, 4.7, 11.5 Hz, 1H), 3.67 (t, *J* = 11.6 Hz, 2H), 3.87 (t, *J* = 6.5 Hz, 2H), 4.14 (dd, *J* = 4.6 Hz, 11.9 Hz, 2H), 4.35 (s, 1H), 6.66 (d, *J* = 8.9 Hz, 2H), 7.00 (d, *J* = 8.1 Hz, 2H), 7.10 (d, *J* = 8.9 Hz, 2H), 7.11 (d, *J* = 7.8 Hz, 2H); <sup>13</sup>C NMR δ 14.1, 22.5, 22.6, 28.2, 28.9, 31.1, 31.5, 35.5, 39.9, 67.9, 72.3, 80.0, 84.6, 98.5, 113.6, 127.3, 128.0, 128.5, 128.6, 133.7, 142.1, 158.9; MS: *m/z* = 538 (M<sup>+</sup>), 117, 174 (100 %); HRMS: calcd. for C<sub>28</sub>H<sub>46</sub>B<sub>10</sub>O<sub>3</sub>: 538.4450; found: 538.4473. Anal. Calcd. for C<sub>28</sub>H<sub>46</sub>B<sub>10</sub>O<sub>3</sub>: C, 62.42; H, 8.61. Found: C, 62.47; H, 8.40.

***trans*-5-(4-Hexylphenyl)-2-[12-(4-pentyloxyphenyl)-*p*-carboran-1-yl][1,3]dioxane**

**(3[6])**. Yield 62%, needles (*n*-hexane): mp 148 °C; <sup>1</sup>H NMR δ 0.87 (t, *J* = 6.5 Hz, 3H), 0.91 (t, *J* = 6.9 Hz, 3H), 1.20-1.45 (m, 10H), 1.50-3.75 (brm, 10H), 1.47-1.62 (m, 2H), 1.73 (quint., *J* = 6.9 Hz, 2H), 2.55 (t, *J* = 7.7 Hz, 2H), 3.08 (tt, 4.6, 11.3 Hz, 1H), 3.67 (t, *J* = 11.6 Hz, 2H), 3.87 (t, *J* = 6.5 Hz, 2H), 4.14 (dd, *J* = 4.5 Hz, 12.0 Hz, 2H), 4.35 (s, 1H), 6.66 (d, *J* = 8.9 Hz, 2H), 7.00 (d, *J* = 8.1 Hz, 2H), 7.10 (d, *J* = 9.2 Hz, 2H), 7.11 (d, *J* = 8.1 Hz, 2H); <sup>13</sup>C NMR δ 14.1, 14.2, 22.5, 22.6, 28.2, 28.9, 29.0, 31.4, 31.7, 35.6, 39.9, 67.9, 72.3, 80.0, 84.5, 98.5, 113.6, 127.2, 128.0, 128.5, 128.6, 133.7, 142.1, 159.0; MS: *m/z* = 552 (M<sup>+</sup>), 43, 117, 188 (100 %); HRMS: calcd. for C<sub>29</sub>H<sub>48</sub>B<sub>10</sub>O<sub>3</sub>: 552.4607; found: 552.4612. Anal. Calcd. for C<sub>29</sub>H<sub>48</sub>B<sub>10</sub>O<sub>3</sub>: C, 63.01; H, 8.75. Found: C, 62.81; H, 8.56.

***trans*-5-(4-Heptylphenyl)-2-[12-(4-pentyloxyphenyl)-*p*-carboran-1-yl][1,3]dioxane**

**(3[7])**. Yield 52%, needles (*n*-hexane): mp 155 °C; <sup>1</sup>H NMR δ 0.87 (t, *J* = 6.8 Hz, 3H), 0.91 (t, *J* = 7.2 Hz, 3H), 1.20-1.45 (m, 12H), 1.50-3.75 (brm, 10H), 1.47-1.62 (m, 2H), 1.73 (quint., *J* = 6.6 Hz, 2H), 2.55 (t, *J* = 7.7 Hz, 2H), 3.08 (tt, 4.6, 11.6 Hz, 1H), 3.67 (t, *J* = 11.6 Hz, 2H), 3.87 (t, *J* = 6.6 Hz, 2H), 4.14 (dd, *J* = 4.6 Hz, 11.9 Hz, 2H), 4.35 (s, 1H), 6.66 (d, *J* = 8.9 Hz, 2H), 7.00 (d, *J* = 8.4 Hz, 2H), 7.10 (d, *J* = 8.9 Hz, 2H), 7.11 (d, *J* = 8.1 Hz, 2H); <sup>13</sup>C NMR δ 14.1, 14.2, 22.5, 22.7, 28.2, 28.9, 29.2, 29.3, 31.5, 31.8, 35.6, 39.9, 67.9, 72.3, 80.0, 84.5, 98.5, 113.6, 127.2, 128.0, 128.5, 128.7, 133.7, 142.1, 159.0; MS: *m/z* = 566 (M<sup>+</sup>), 43, 117, 202 (100 %);

HRMS: calcd. for  $C_{30}H_{50}B_{10}O_3$ : 566.4763; found: 566.4746. Anal. Calcd. for  $C_{30}H_{50}B_{10}O_3$ : C, 63.57; H, 8.89. Found: C, 63.59; H, 8.72.

**12-(4-Pentyloxyphenyl)-*p*-carborane-1-carbaldehyde (4).** To a stirred solution of 1-(4-pentyloxyphenyl)-*p*-carborane<sup>8</sup> (**13**, 1.00 g, 3.27 mmol) in anhydrous  $Et_2O$  (10 mL) was added dropwise a 1.6 M solution of *n*-BuLi (2.51 mL, 3.92 mmol) at 0 °C under argon atmosphere and the reaction mixture was stirred at room temperature for 30 min. Then  $HCO_2Et$  (0.32 mL, 3.92 mmol) was added at -78 °C and the reaction mixture was stirred at room temperature for 24 hr. The mixture was poured into water and the whole was extracted with AcOEt. The organic layer was washed with brine, dried ( $MgSO_4$ ), and concentrated. The crude product was purified by silica gel column chromatography (hexane/ $CH_2Cl_2$ , 15:1) to give 0.802 g (74% yield) of aldehyde **4** as colorless powder (*n*-hexane): mp 59 °C;  $^1H$  NMR  $\delta$  0.91 (t,  $J = 7.1$  Hz, 3H), 1.29-1.45 (m, 4H), 1.50-3.75 (brm, 10H), 1.74 (quint.,  $J = 6.9$  Hz, 2H), 3.88 (t,  $J = 6.5$  Hz, 2H), 6.67 (d,  $J = 9.1$  Hz, 2H), 7.11 (d,  $J = 8.9$  Hz, 2H), 8.88 (s, 1H). Anal. Calcd. for  $C_{14}H_{26}B_{10}O_2$ : C, 50.27; H, 7.84. Found: C, 50.46; H, 7.77.

**2-Alkyl-1,3-propanediols (5[n]), 2-(4-Alkyloxyphenyl)-1,3-propanediols (6[n]), and 2-(4-alkylphenyl)-1,3-propanediols (7[n]). General procedure.** To a solution of corresponding diethyl alkylmalonate (**8[n]**) or diethyl arylmalonate (**9[n]** or **10[n]**) in dry THF was added  $LiAlH_4$  (4.0 equiv.) in small portion at 0 °C and the reaction mixture was stirred at ambient temperature for 12-24 hr under argon. Then, the reaction mixture was poured into ice water and added 10 % HCl. The whole was extracted with  $Et_2O$  and the organic layer was washed with brine, dried ( $MgSO_4$ ) and concentrated. The crude product **5[n]** was purified by silica gel column chromatography (hexane/AcOEt, 1:1) to give the corresponding 2-alkyl-1,3-propanediol as a colorless oil. The crude 2-aryl-1,3-propanediols were recrystallized from *n*-hexane to give pure colorless products.

**2-Butyl-1,3-propanediol (5[4]).**<sup>9,10</sup> Yield 73%, oil:  $^1H$  NMR  $\delta$  0.90 (t,  $J = 6.9$  Hz, 3 H), 1.20-1.40 (m, 6 H), 1.70-1.85 (m, 1 H), 2.34 (brs, 2 H), 3.66 (dd,  $J = 7.6, 10.5$  Hz, 2 H), 3.83 (dd,  $J = 3.8, 10.5$  Hz, 2 H); MS:  $m/z = 132$  ( $M^+$ ), 84 (100); HRMS: calcd. for  $C_7H_{16}O_2$ : 132.1150; found: 132.1126.

**2-Pentyl-1,3-propanediol (5[5]).**<sup>11,12</sup> Yield 54%, oil (lit.<sup>11</sup> bp 100-106 °C/0.2 mm Hg):  $^1H$  NMR  $\delta$  0.89 (t,  $J = 6.8$  Hz, 3H), 1.16-1.40 (m, 8H), 1.71-1.84 (m, 1H), 2.37 (brs, 2H), 3.66 (dd,  $J = 7.7, 10.5$  Hz, 2H), 3.82 (dd,  $J = 3.8, 10.5$  Hz, 2H);  $^{13}C$  NMR  $\delta$  14.13, 22.62, 26.95,

27.73, 32.12, 42.03, 66.8; MS:  $m/z = 147$  ( $M^+$ ), 55 (100); HRMS: calcd. for  $C_8H_{18}O_2$ : 146.1307; found: 146.1307.

**2-Hexyl-1,3-propanediol (5[6]).**<sup>11,13</sup> Yield 44%; oil (lit.<sup>11</sup> mp 30-32 °C);  $^1H$  NMR  $\delta$  0.88 (t,  $J = 6.6$  Hz, 3H), 1.20-1.40 (m, 10H), 1.70-1.85 (m, 1H), 2.15 (t,  $J = 5.0$  Hz, 2H), 3.66 (ddd,  $J = 4.6, 7.4, 10.5$  Hz, 2H), 3.82 (ddd,  $J = 4.1, 5.3, 10.2$  Hz, 2H);  $^{13}C$  NMR  $\delta$  14.2, 22.7, 27.2, 27.8, 29.6, 31.8, 42.0, 66.8.

**2-Heptyl-1,3-propanediol (5[7]).**<sup>10</sup> Yield 44%; oil (lit.<sup>10</sup> mp 32-32.1 °C);  $^1H$  NMR  $\delta$  0.88 (t,  $J = 6.8$  Hz, 3H), 1.14-1.40 (m, 12H), 1.65-1.85 (m, 1H), 2.32 (brs, 2H), 3.65 (dd,  $J = 7.6, 10.5$  Hz, 2H), 3.82 (dd,  $J = 3.8, 10.5$  Hz, 2H);  $^{13}C$  NMR  $\delta$  14.2, 22.7, 27.3, 27.8, 29.3, 29.9, 31.9, 42.0, 66.8; MS:  $m/z = 174$  ( $M^+$ ), 55(100); HRMS: calcd. for  $C_{10}H_{22}O_2$ : 174.1620; found: 174.1593. Anal. Calcd. for  $C_{10}H_{22}O_2$ : C, 68.92; H, 12.72. Found: C, 68.80; H, 12.63.

**2-Octyl-1,3-propanediol (5[8]).**<sup>13</sup> Yield 68%; leaflets; mp 40-41 °C;  $^1H$  NMR  $\delta$  0.88 (t,  $J = 6.6$  Hz, 3H), 1.20-1.35 (m, 14H), 1.70-1.85 (m, 1H), 2.22 (brs, 2H), 3.66 (dd,  $J = 7.6, 10.5$  Hz, 2H), 3.83 (dd,  $J = 3.5, 10.5$  Hz, 2H);  $^{13}C$  NMR  $\delta$  14.2, 22.7, 27.3, 27.8, 29.4, 29.6, 30.0, 31.9, 42.0, 66.8; MS:  $m/z = 188$  ( $M^+$ ), 41, 55 (100 %); HRMS: calcd. for  $C_{11}H_{24}O_2$ : 188.1776; found: 188.1806. Anal. Calcd. for  $C_{11}H_{24}O_2$ : C, 70.16; H, 12.85. Found: C, 70.23; H, 13.07.

**2-Nonyl-1,3-propanediol (5[9]).** Yield 63%; leaflets; mp 44-45 °C;  $^1H$  NMR  $\delta$  0.88 (t,  $J = 6.5$  Hz, 3H), 1.20-1.40 (m, 16H), 1.70-1.85 (m, 1H), 2.22 (brs, 2H), 3.66 (dd,  $J = 7.6, 10.5$  Hz, 2H), 3.83 (dd,  $J = 3.8, 10.5$  Hz, 2H); MS:  $m/z = 203$  ( $M^+$ ), 43 (100 %); HRMS: calcd. for  $C_{12}H_{26}O_2$ : 202.1933; found: 202.1915. Anal. calcd. for  $C_{12}H_{26}O_2$ : C, 71.23; H, 12.95. Found: C, 71.44; H, 13.23.

**2-Decyl-1,3-propanediol (5[10]).**<sup>14</sup> Yield 66%; needles; mp 57 °C (lit.<sup>14</sup> mp 60 °C);  $^1H$  NMR  $\delta$  0.88 (t,  $J = 7.0$  Hz, 3H), 1.20-1.30 (m, 18H), 1.70-1.85 (m, 1H), 2.24 (brs, 2H), 3.66 (dd,  $J = 7.8, 10.5$  Hz, 2H), 3.82 (dd,  $J = 3.8, 10.5$  Hz, 2H); MS:  $m/z = 216$  ( $M^+$ ), 32, 43, 57 (100 %); HRMS: calcd. for  $C_{13}H_{28}O_2$ : 216.2089; found: 216.2108. Anal. calcd. for  $C_{13}H_{28}O_2$ : C, 72.17; H, 13.04. Found: C, 72.26; H, 13.33.

**2-(4-Methoxyphenyl)-1,3-propanediol (6[1]).**<sup>15,16</sup> Yield 67%; mp 83-85 °C (lit.<sup>16</sup> mp 83-85 °C);  $^1H$  NMR  $\delta$  2.45 (br s, 2H), 3.07 (tt,  $J = 5.7$  Hz, 7.4 Hz, 1H), 3.80 (s, 3H), 3.91 (dd,  $J = 5.7, 10.8$  Hz, 2H), 3.98 (dd,  $J = 7.4, 10.9$  Hz, 2H), 6.88 (d,  $J = 8.9$  Hz, 2H), 7.16 (d,  $J = 8.9$  Hz, 2H);  $^{13}C$  NMR  $\delta$  49.0, 55.3, 66.1, 114.3, 129.0, 131.1, 158.8.

**2-(4-Ethoxyphenyl)-1,3-propanediol (6[2]).**<sup>17</sup> Yield 32% for 2 steps from *p*-ethoxyiodobenzene **11[2]**): mp 75-76 °C; <sup>1</sup>H NMR δ 1.41 (t, *J* = 7.0 Hz, 3H), 1.93 (br s, 2H), 3.06 (tt, *J* = 5.8 Hz, 7.4 Hz, 1H), 3.87-4.01 (m, 4H), 4.02 (q, *J* = 7.0 Hz, 2H), 6.87 (d, *J* = 8.7 Hz, 2H), 7.15 (d, *J* = 8.7 Hz, 2H); <sup>13</sup>C NMR δ 14.8, 48.9, 63.4, 66.1, 114.8, 128.9, 131.0, 158.0; MS: *m/z* = 196 (M<sup>+</sup>), 165 (100 %). Anal. Calcd for C<sub>11</sub>H<sub>16</sub>O<sub>3</sub>: C, 67.32; H, 8.22. Found: C, 67.22; H, 8.09.

**2-(4-Propoxyphenyl)-1,3-propanediol (6[3]).** Yield 30% for 2 steps from *p*-propoxyiodobenzene **11[3]**): mp 68-69 °C; <sup>1</sup>H NMR δ 1.03 (t, *J* = 7.4 Hz, 3H), 1.80 (sext., *J* = 7.1 Hz, 2H), 1.89 (t, *J* = 5.6 Hz, 2H), 3.06 (tt, *J* = 5.9 Hz, 7.4 Hz, 1H), 3.85-4.02 (m, 4H), 3.90 (t, *J* = 6.5 Hz, 2H), 6.87 (d, *J* = 8.7 Hz, 2H), 7.15 (d, *J* = 8.6 Hz, 2H); <sup>13</sup>C NMR δ 10.5, 22.5, 48.8, 66.0, 69.5, 114.7, 128.9, 131.0, 158.2; MS: *m/z* = 210 (M<sup>+</sup>), 179 (100 %). Anal. calcd for C<sub>12</sub>H<sub>18</sub>O<sub>3</sub>: C, 68.54; H, 8.63. Found: C, 68.43; H, 8.86.

**2-(4-Butoxyphenyl)-1,3-propanediol (6[4]).**<sup>13</sup> Yield 51%; rods: mp 71-72 °C (lit.<sup>13</sup> mp 70-72 °C); <sup>1</sup>H NMR δ 0.97 (t, *J* = 7.4 Hz, 3H), 1.49 (q., *J* = 7.5 Hz, 2H), 1.76 (quint., *J* = 7.0 Hz, 2H), 2.00 (br s, 2H), 3.05 (tt, *J* = 5.9 Hz, 7.3 Hz, 1H), 3.87-4.01 (m, 4H), 3.94 (t, *J* = 6.5 Hz, 2H), 6.87 (d, *J* = 8.9 Hz, 2H), 7.14 (d, *J* = 8.6 Hz, 2H); MS: *m/z* = 224 (M<sup>+</sup>), 193 (100); HRMS: calcd for C<sub>13</sub>H<sub>20</sub>O<sub>3</sub>: 224.1412; found 224.1413.

**2-(4-Pentyloxyphenyl)-1,3-propanediol (6[5]).** Yield 69%; leaflets: mp 59 °C; <sup>1</sup>H NMR δ 0.93 (t, *J* = 7.2 Hz, 3H), 1.30-1.49 (m, 4H), 1.77 (quint., *J* = 7.0 Hz, 2H), 2.53 (br s, 2H), 3.02 (tt, *J* = 5.7 Hz, 7.6 Hz, 1H), 3.80-4.00 (m, 4H), 3.92 (t, *J* = 6.5 Hz, 2H), 6.85 (d, *J* = 8.9 Hz, 2H), 7.11 (d, *J* = 8.6 Hz, 2H); <sup>13</sup>C NMR δ 14.1, 22.5, 28.2, 29.0, 48.9, 66.1, 68.0, 114.7, 128.8, 130.8, 158.1; MS: *m/z* = 238 (M<sup>+</sup>), 43 (100 %); HRMS: calcd for C<sub>14</sub>H<sub>22</sub>O<sub>3</sub>: 238.1569; found 238.1587. Anal. Calcd for C<sub>14</sub>H<sub>22</sub>O<sub>3</sub>: C, 70.56; H, 9.30. Found: C, 70.35; H, 9.46.

**2-(4-Hexyloxyphenyl)-1,3-propanediol (6[6]).** Yield 73%; leaflets: mp 60 °C; <sup>1</sup>H NMR (270 MHz, CDCl<sub>3</sub>) δ 0.90 (t, *J* = 6.9 Hz, 3H), 1.25-1.58 (m, 6H), 1.77 (quint., *J* = 7.0 Hz, 2H), 1.94 (br s, 2H), 3.06 (tt, *J* = 5.7 Hz, 7.6 Hz, 1H), 3.85-4.01 (m, 4H), 3.93 (t, *J* = 6.6 Hz, 2H), 6.87 (d, *J* = 8.9 Hz, 2H), 7.14 (d, *J* = 8.9 Hz, 2H); <sup>13</sup>C NMR δ 14.1, 22.6, 25.7, 29.3, 31.6, 48.8, 66.0, 68.0, 114.6, 128.8, 130.9, 158.0; MS: *m/z* = 252 (M<sup>+</sup>), 221 (100 %); HRMS: calcd for C<sub>15</sub>H<sub>24</sub>O<sub>3</sub>: 252.1725; found 252.1716. Anal. Calcd for C<sub>15</sub>H<sub>24</sub>O<sub>3</sub>: C, 71.39; H, 9.59. Found: C, 71.32; H, 9.71.



**2-(4-Heptyloxyphenyl)-1,3-propanediol (6[7]).** Yield 71%; prisms: mp 58-60 °C;  $^1\text{H}$  NMR  $\delta$  0.89 (t,  $J = 6.5$  Hz, 3H), 1.25-1.50 (m, 8H), 1.77 (quint.,  $J = 6.9$  Hz, 2H), 1.97 (br s, 2H), 3.06 (tt,  $J = 5.7$  Hz, 7.6 Hz, 1H), 3.85-4.01 (m, 4H), 3.93 (t,  $J = 6.5$  Hz, 2H), 6.86 (d,  $J = 8.9$  Hz, 2H), 7.14 (d,  $J = 8.9$  Hz, 2H);  $^{13}\text{C}$  NMR  $\delta$  14.1, 22.6, 26.0, 29.1, 29.3, 31.8, 48.9, 66.0, 68.0, 114.7, 128.8, 130.9, 158.1; MS:  $m/z = 266$  ( $\text{M}^+$ ), 235 (100 %); HRMS: calcd for  $\text{C}_{16}\text{H}_{26}\text{O}_3$ : 266.1882; found 266.1866. Anal. Calcd for  $\text{C}_{16}\text{H}_{26}\text{O}_3$ : C, 72.14; H, 9.84. Found: C, 72.15; H, 10.01.

**2-(4-Octyloxyphenyl)-1,3-propanediol (6[8]).** Yield 44%; cubes: mp 61-62 °C;  $^1\text{H}$  NMR  $\delta$  0.89 (t,  $J = 6.8$  Hz, 3H), 1.25-1.45 (m, 10H), 1.77 (quint.,  $J = 7.0$  Hz, 2H), 1.94 (br s, 2H), 3.06 (tt,  $J = 5.7$  Hz, 7.3 Hz, 1H), 3.87-4.00 (m, 6H), 6.87 (d,  $J = 8.9$  Hz, 2H), 7.14 (d,  $J = 8.6$  Hz, 2H);  $^{13}\text{C}$  NMR  $\delta$  14.0, 22.6, 26.0, 29.18, 29.24, 29.3, 31.8, 48.9, 66.1, 68.0, 114.8, 128.9, 130.9, 158.3; MS:  $m/z = 280$  ( $\text{M}^+$ ), 249 (100 %); Anal. Calcd for  $\text{C}_{17}\text{H}_{28}\text{O}_3$ : C, 72.82; H, 10.06. Found: C, 72.95; H, 10.19.

**2-(4-Nonyloxyphenyl)-1,3-propanediol (6[9]).** Yield 40%; cubes: mp 64-65 °C;  $^1\text{H}$  NMR  $\delta$  0.88 (t,  $J = 6.6$  Hz, 3H), 1.20-1.50 (m, 12H), 1.77 (quint.,  $J = 7.0$  Hz, 2H), 1.99 (br s, 2H), 3.06 (tt,  $J = 5.9$  Hz, 7.4 Hz, 1H), 3.82-4.00 (m, 6H), 6.87 (d,  $J = 8.6$  Hz, 2H), 7.14 (d,  $J = 8.9$  Hz, 2H);  $^{13}\text{C}$  NMR  $\delta$  14.1, 22.6, 26.0, 29.2, 29.3, 29.4, 29.5, 31.9, 49.0, 66.2, 68.1, 114.9, 129.0, 130.9, 158.4; MS:  $m/z = 294$  ( $\text{M}^+$ ), 263 (100 %). Anal. Calcd for  $\text{C}_{18}\text{H}_{30}\text{O}_3$ : C, 73.43; H, 10.27. Found: C, 73.73; H, 10.40.

**2-(4-Decyloxyphenyl)-1,3-propanediol (6[10]).** Yield 50%; cubes: mp 69-70 °C;  $^1\text{H}$  NMR  $\delta$  0.88 (t,  $J = 6.6$  Hz, 3H), 1.25-1.50 (m, 14H), 1.77 (quint.,  $J = 6.9$  Hz, 2H), 1.97 (br s, 2H), 3.06 (tt,  $J = 5.9$  Hz, 7.3 Hz, 1H), 3.82-4.00 (m, 6H), 6.87 (d,  $J = 8.9$  Hz, 2H), 7.14 (d,  $J = 8.9$  Hz, 2H);  $^{13}\text{C}$  NMR  $\delta$  14.1, 22.6, 26.0, 29.2, 29.3, 29.4, 29.52, 29.53, 31.8, 48.8, 66.1, 68.0, 114.7, 128.9, 130.9, 158.2. Anal. Calcd for  $\text{C}_{19}\text{H}_{32}\text{O}_3$ : C, 73.98; H, 10.46. Found: C, 73.88; H, 10.54.

**2-(4-Pentylphenyl)-1,3-propanediol (7[5]).**<sup>18</sup> Yield 62%; leaflets (*n*-hexane); mp 71 °C (lit.<sup>18</sup> mp 71.1-73.5 °C)  $^1\text{H}$  NMR  $\delta$  0.89 (t,  $J = 6.8$  Hz, 3H), 1.26-1.34 (m, 4H), 1.60 (quint.,  $J = 7.5$  Hz, 2H), 1.96 (t,  $J = 5.5$  Hz, 2H), 2.57 (t,  $J = 7.8$  Hz, 2H), 3.08 (tt,  $J = 5.7$  Hz, 7.6 Hz, 1H), 3.88-4.04 (m, 4H), 7.14 (s, 4H); MS:  $m/z = 222$  ( $\text{M}^+$ ), 174 (100 %);  $^{13}\text{C}$  NMR  $\delta$  14.0, 22.5, 31.1,

31.5, 35.5, 49.5, 66.1, 127.9, 128.8, 136.3, 142.0; HRMS: calcd for C<sub>14</sub>H<sub>22</sub>O<sub>2</sub>: 222.1620; found 222.1639. Anal. Calcd for C<sub>14</sub>H<sub>22</sub>O<sub>2</sub>: C, 75.63; H, 9.97. Found: C, 75.45; H, 10.22.

**2-(4-Hexylphenyl)-1,3-propanediol (7[6]).**<sup>13</sup> Yield 56%; prisms: mp 68 °C (lit.<sup>13</sup> mp 72-74 °C); <sup>1</sup>H NMR δ 0.88 (t, *J* = 6.8 Hz, 3H), 1.20-1.30 (m, 6H), 1.55-1.65 (m, 2H), 1.94 (t, *J* = 5.6 Hz, 2H), 2.58 (t, *J* = 7.8 Hz, 2H), 3.08 (tt, *J* = 5.7 Hz, 7.6 Hz, 1H), 3.88-4.04 (m, 4H), 7.14 (s, 4H); <sup>13</sup>C NMR δ 14.2, 22.7, 29.1, 31.5, 31.7, 35.6, 49.3, 65.9, 127.7, 128.6, 136.2, 141.7; MS: *m/z* = 236 (M<sup>+</sup>), 188 (100 %); HRMS: calcd for C<sub>15</sub>H<sub>24</sub>O<sub>2</sub>: 236.1776; found 236.1769. Anal. Calcd for C<sub>15</sub>H<sub>24</sub>O<sub>2</sub>: C, 76.23; H, 10.24. Found: C, 76.04; H, 10.44.

**2-(4-Heptylphenyl)-1,3-propanediol (7[7]).** Yield 72%; prisms: mp 69-70 °C; <sup>1</sup>H NMR δ 0.88 (t, *J* = 6.8 Hz, 3H), 1.25-1.35 (m, 8H), 1.59 (quint., *J* = 7.6 Hz, 2H), 1.93 (t, *J* = 5.4 Hz, 2H), 2.57 (t, *J* = 7.7 Hz, 2H), 3.09 (tt, *J* = 5.7 Hz, 7.6 Hz, 1H), 3.88-4.04 (m, 4H), 7.14 (s, 4H); <sup>13</sup>C NMR δ 14.2, 22.7, 29.2, 29.4, 31.5, 31.9, 35.6, 49.3, 66.0, 127.7, 128.7, 136.2, 141.7; MS: *m/z* = 250 (M<sup>+</sup>), 202 (100 %); HRMS: calcd for C<sub>16</sub>H<sub>26</sub>O<sub>2</sub>: 250.1933; found 250.1940. Anal. Calcd for C<sub>16</sub>H<sub>26</sub>O<sub>2</sub>: C, 76.75; H, 10.47. Found: C, 76.60; H, 10.68.

**Diethyl Arylmalonates 9[n] and 10[n]. General procedure.** A double neck flask was charged sequentially with CuI (20 mol %), 2-phenylphenol (40 mol %) and Cs<sub>2</sub>CO<sub>3</sub> (1.5 equiv.). The flask was evacuated and backfilled with argon (3 times). The aryl iodide was added followed by diethyl malonate (2.0 equiv) and anhydrous 1,4-dioxane. The reaction mixture was refluxed for 17 hr. Then the reaction mixture was cooled and filtrated through Celite. The filtrate was washed with saturate aqueous NH<sub>4</sub>Cl followed by brine, dried over MgSO<sub>4</sub> and concentrated. The crude product purified by silica gel flash column chromatography (*n*-hexane/AcOEt, 15:1) to give diethyl arylmalonate as a colorless oil.

**Diethyl (4-Methoxyphenyl)malonate (9[1]).**<sup>19</sup> Yield 70%; <sup>1</sup>H NMR δ 1.26 (t, *J* = 7.0 Hz, 6H), 3.80 (s, 1H), 4.12-4.29 (m, 4H), 4.55 (s, 1H), 6.89 (d, *J* = 8.9 Hz, 2 H), 7.33 (d, *J* = 8.9 Hz, 2H); <sup>13</sup>C NMR δ 14.0, 55.2, 57.1, 61.7, 114.0, 124.9, 130.4, 159.5, 168.4.

**Diethyl (4-Ethoxyphenyl)malonate (9[2]).**<sup>17,19</sup> Isolation of 9[2] from 2-phenylphenol was not achieved with any solvent system. Therefore the mixture was used in the reduction of malonate 9[2] with LiAlH<sub>4</sub> without further purification.

**Diethyl (4-Propoxyphenyl)malonate (9[3]).**<sup>19</sup> Isolation of **9[3]** from 2-phenylphenol was not achieved with any solvent system. Therefore the mixture was used in the reduction of malonate **9[3]** with LiAlH<sub>4</sub> without further purification.

**Diethyl (4-Butoxyphenyl)malonate (9[4]).**<sup>19</sup> Yield 30%: <sup>1</sup>H NMR δ 0.93 (t, *J* = 6.9 Hz, 3H), 1.26 (t, *J* = 7.2 Hz, 6H), 1.33-1.49 (m, 4H), 1.78 (quint., *J* = 6.8 Hz, 2H), 3.94 (t, *J* = 6.6 Hz, 2H), 4.12-4.29 (m, 4H), 4.54 (s, 1H), 6.87 (d, *J* = 8.6 Hz, 2H), 7.30 (d, *J* = 8.6 Hz, 2H).

**Diethyl (4-Pentyloxyphenyl)malonate (9[5]).**<sup>19</sup> Yield 38%: <sup>1</sup>H NMR δ 0.93 (t, *J* = 6.9 Hz, 3H), 1.26 (t, *J* = 7.2 Hz, 6H), 1.33-1.49 (m, 4H), 1.78 (quint., *J* = 6.8 Hz, 2H), 3.94 (t, *J* = 6.6 Hz, 2H), 4.12-4.29 (m, 4H), 4.54 (s, 1H), 6.87 (d, *J* = 8.6 Hz, 2H), 7.30 (d, *J* = 8.6 Hz, 2H); <sup>13</sup>C NMR δ 14.1, 22.5, 28.2, 29.0, 57.2, 61.7, 67.9, 114.4, 124.5, 130.2, 158.9, 168.3; MS: *m/z* = 322 (M<sup>+</sup>), 179 (100); HRMS: calcd for C<sub>18</sub>H<sub>26</sub>O<sub>5</sub>: 322.1780; found 322.1796.

**Diethyl (4-Hexyloxyphenyl)malonate (9[6]).**<sup>19</sup> Yield 56%: <sup>1</sup>H NMR δ 0.90 (t, *J* = 6.8 Hz, 3H), 1.26 (t, *J* = 7.2 Hz, 6H), 1.27-1.52 (m, 6H), 1.77 (quint., *J* = 7.0 Hz, 2H), 3.94 (t, *J* = 6.6 Hz, 2H), 4.12-4.29 (m, 4H), 4.54 (s, 1H), 6.87 (d, *J* = 8.6 Hz, 2H), 7.3 (d, *J* = 8.6 Hz, 2H); <sup>13</sup>C NMR δ 14.1, 22.7, 25.8, 29.3, 31.6, 57.2, 61.7, 68.0, 114.4, 124.5, 130.2, 158.9, 168.3; MS: *m/z* = 336 (M<sup>+</sup>), 179 (100); HRMS: calcd for C<sub>19</sub>H<sub>28</sub>O<sub>5</sub>: 336.1937; found 336.1921.

**Diethyl (4-Heptyloxyphenyl)malonate (9[7]).**<sup>19</sup> Yield 59%: <sup>1</sup>H NMR δ 0.89 (t, *J* = 6.8 Hz, 3H), 1.26 (t, *J* = 7.2 Hz, 6H), 1.24-1.52 (m, 8H), 1.77 (quint., *J* = 7.0 Hz, 2H), 3.94 (t, *J* = 6.5 Hz, 2H), 4.12-4.29 (m, 4H), 4.54 (s, 1H), 6.87 (d, *J* = 8.4 Hz, 2H), 7.30 (d, *J* = 8.6 Hz, 2H); <sup>13</sup>C NMR δ 14.1, 14.2, 22.7, 26.1, 29.1, 29.3, 31.8, 57.2, 61.7, 68.0, 114.4, 124.5, 130.2, 158.9, 168.3; MS: *m/z* = 350 (M<sup>+</sup>), 179 (100); HRMS: calcd for C<sub>20</sub>H<sub>30</sub>O<sub>5</sub>: 350.2093; found 350.2071.

**Diethyl (4-Octyloxyphenyl)malonate (9[8]).**<sup>19</sup> Yield 60%: (lit.<sup>19</sup> mp 26-27 °C); <sup>1</sup>H NMR δ 0.89 (t, *J* = 6.8 Hz, 3H), 1.26 (t, *J* = 7.0 Hz, 6H), 1.23-1.52 (m, 10H), 1.77 (quint., *J* = 6.9 Hz, 2H), 3.94 (t, *J* = 6.6 Hz, 2H), 4.15-4.29 (m, 4H), 4.54 (s, 1H), 6.87 (d, *J* = 8.9 Hz, 2H), 7.3 (d, *J* = 8.9 Hz, 2H); MS: *m/z* = 364 (M<sup>+</sup>), 179 (100); HRMS: calcd for C<sub>21</sub>H<sub>32</sub>O<sub>5</sub>: 364.2250; found 364.2241.

**Diethyl (4-Nonyloxyphenyl)malonate (9[9]).**<sup>19</sup> Yield 67%: <sup>1</sup>H NMR δ 0.88 (t, *J* = 6.6 Hz, 3H), 1.26 (t, *J* = 7.2 Hz, 6H), 1.20-1.50 (m, 12H), 1.77 (quint., *J* = 7.0 Hz, 2H), 3.94 (t, *J* = 6.6 Hz, 2H), 4.11-4.29 (m, 4H), 4.54 (s, 1H), 6.87 (d, *J* = 8.6 Hz, 2H), 7.30 (d, *J* = 8.6 Hz, 2H); <sup>13</sup>C NMR δ 14.0, 14.1, 22.7, 26.0, 29.2, 29.4, 29.5, 31.9, 57.2, 61.7, 68.0, 114.6, 124.7, 130.3,

159.1, 168.5; MS:  $m/z = 378$  ( $M^+$ ), 179 (100); HRMS: calcd for  $C_{22}H_{34}O_5$ : 378.2406; found 378.2394.

**Diethyl (4-Decyloxyphenyl)malonate (9[10]).**<sup>19</sup> Yield 66%, rods (*n*-hexane): mp 38 °C; (lit.<sup>19</sup> mp 38-39 °C); <sup>1</sup>H NMR  $\delta$  0.88 (t,  $J = 6.6$  Hz, 3H), 1.26 (t,  $J = 7.0$  Hz, 6H), 1.20-1.50 (m, 14H), 1.77 (quint.,  $J = 6.9$  Hz, 2H), 3.94 (t,  $J = 6.5$  Hz, 2H), 4.11-4.29 (m, 4H), 4.54 (s, 1H), 6.87 (d,  $J = 8.6$  Hz, 2H), 7.30 (d,  $J = 8.9$  Hz, 2H); <sup>13</sup>C NMR  $\delta$  14.0, 14.1, 22.7, 26.1, 29.26, 29.31, 29.39, 29.56, 29.58, 31.9, 57.2, 61.7, 68.0, 114.6, 124.7, 130.3, 159.1, 168.5; MS:  $m/z = 392$  ( $M^+$ ), 179 (100); HRMS: calcd for  $C_{23}H_{36}O_5$ : 392.2563; found 392.2554. Anal. Calcd for  $C_{23}H_{36}O_5$ : C, 70.38; H, 9.24. Found: C, 70.50; H, 9.47.

**Diethyl (4-Pentylphenyl)malonate (10[5]).**<sup>19</sup> Yield 46%: <sup>1</sup>H NMR  $\delta$  0.89 (t,  $J = 6.8$  Hz, 3H), 1.26 (t,  $J = 7.2$  Hz, 6H), 1.22-1.30 (m, 4H), 1.61 (quint.,  $J = 7.6$  Hz, 2H), 2.59 (t,  $J = 7.7$  Hz, 2H), 4.11-4.29 (m, 4H), 4.57 (s, 1H), 7.16 (d,  $J = 8.1$  Hz, 2H), 7.30 (d,  $J = 8.1$  Hz, 2H); <sup>13</sup>C NMR  $\delta$  14.0, 22.5, 31.0, 31.5, 35.6, 57.6, 61.6, 128.4, 128.9, 129.8, 142.7, 168.1; MS:  $m/z = 306$  ( $M^+$ ), 233 (100); HRMS: calcd for  $C_{18}H_{26}O_4$ : 306.1831; found 306.1825.

**Diethyl (4-Hexylphenyl)malonate (10[6]).**<sup>19</sup> Yield 36%: <sup>1</sup>H NMR  $\delta$  0.88 (t,  $J = 6.6$  Hz, 3H), 1.26 (t,  $J = 7.2$  Hz, 6H), 1.26-1.40 (m, 6H), 1.60 (quint.,  $J = 7.6$  Hz, 2H), 2.59 (t,  $J = 7.7$  Hz, 2H), 4.12-4.29 (m, 4H), 4.57 (s, 1H), 7.16 (d,  $J = 8.1$  Hz, 2H), 7.30 (d,  $J = 8.1$  Hz, 2H); <sup>13</sup>C NMR  $\delta$  13.9, 14.0, 22.5, 28.9, 31.2, 31.6, 35.5, 57.5, 61.5, 128.3, 128.8, 129.8, 142.6, 197.9; MS:  $m/z = 320$  ( $M^+$ ), 247 (100); HRMS: calcd for  $C_{19}H_{28}O_4$ : 320.1988; found 320.1966.

**Diethyl (4-Heptylphenyl)malonate (10[7]).** Yield 38%: <sup>1</sup>H NMR  $\delta$  0.88 (t,  $J = 6.8$  Hz, 3H), 1.26 (t,  $J = 7.2$  Hz, 6H), 1.23-1.35 (m, 8H), 1.60 (quint.,  $J = 7.8$  Hz, 2H), 2.59 (t,  $J = 7.7$  Hz, 2H), 4.12-4.29 (m, 4H), 4.57 (s, 1H), 7.16 (d,  $J = 8.1$  Hz, 2H), 7.30 (d,  $J = 8.1$  Hz, 2H); <sup>13</sup>C NMR  $\delta$  14.1, 14.2, 22.7, 29.2, 29.4, 31.4, 31.9, 35.7, 57.6, 61.7, 128.5, 128.9, 129.8, 142.8, 168.1; MS:  $m/z = 334$  ( $M^+$ ), 262 (100); HRMS: calcd for  $C_{20}H_{30}O_4$ : 334.2144; found 334.2157.

## 8. Archive files for HF/6-31G(d) calculations

### 1[4] conformer A

```
1\1\GINC-MONSTER\FOpt\RHF\6-31G(d)\C21H40B10O3\PIOTR\19-Jan-2006\0\#\#P
HF/6-31G* FOPT GEOM(NOANGLE, NODISTANCE) FCHECK\1-(4-Pentyloxyphenyl
)-12-(5-butyldiox[1,3]an-2-yl)-p-carborane C1, high diople\0,1\B,-1.3
438728076,1.5369720748,-0.9756788801\B,-1.3385317418,1.5107808833,0.80
88764064\B,0.3544845693,1.5422741868,-1.5346191225\B,0.3597738665,1.52
50901984,1.357533908\B,1.4095111305,1.5348144331,-0.0897124037\B,1.123
```

Supplementary Material (ESI) for Journal of Materials Chemistry  
This journal is © The Royal Society of Chemistry 2006

2171911,0.0264746285,0.7963144078\B,1.1107211837,0.0432661405,-0.98678  
36885\B,-0.5714414237,0.0175490247,1.3483318458\B,-1.625953302,0.02488  
56186,-0.0958915598\B,-0.5839434151,0.0384246785,-1.5418149409\C,-0.11  
0209294,-0.7956498126,-0.0996541587\C,-0.1307704136,-2.3137654166,-0.0  
926880876\C,0.8145773993,-3.0683574,-0.7898823072\C,0.7864675013,-4.44  
44690186,-0.7767756898\C,-0.1940983094,-5.1254116481,-0.0616793762\O,-  
0.138251054,-6.4685749236,-0.1099326566\C,-1.0866166522,-7.2436733869,  
0.5809735002\C,-0.7585343562,-8.7050736769,0.3325138074\C,-1.730893769  
9,-9.6502485697,1.0400991472\C,-1.4102855162,-11.1262568105,0.79701176  
93\C,-2.3814630349,-12.0708266261,1.5037505808\C,-1.1415702434,-4.3958  
77008,0.6367516894\C,-1.0996845472,-3.0083551704,0.6136195153\C,-0.115  
9514587,2.3335329812,-0.0795367821\C,-0.169202302,3.8647408918,-0.0327  
956263\O,-0.3531569619,4.3575163578,-1.3091050381\C,-0.4290617525,5.76  
13713432,-1.3534134288\C,0.8188105933,6.3919907552,-0.7390905992\C,1.0  
265698076,5.7514432854,0.6323796301\O,0.9946850241,4.3479067005,0.5301  
883869\C,0.698942297,7.9185065643,-0.6864752544\C,1.9729183407,8.64505  
69296,-0.2447978242\C,1.8386334291,10.1678662946,-0.3086208146\C,3.105  
8182838,10.8966883265,0.1366097199\H,-2.1640980288,2.1553850617,-1.550  
1880084\H,-2.1474169283,2.131340817,1.4027287801\H,0.6673519483,2.1531  
167547,-2.4878727011\H,0.6600692237,2.1358002342,2.3178560633\H,2.4158  
182639,2.1406134153,-0.0933834056\H,1.9340770067,-0.5997875079,1.37868  
87074\H,1.9390348941,-0.5294165544,-1.5944103303\H,-0.8711860181,-0.59  
69137205,2.3075298706\H,-2.6337141942,-0.5848780585,-0.1064558963\H,-0  
.8946152261,-0.5800770363,-2.495643756\H,1.5859994252,-2.5833506523,-1  
.3528556951\H,1.5192468637,-5.014133201,-1.3170966095\H,-1.0463200495,  
-7.0173873392,1.6428038211\H,-2.0858698622,-7.0096453365,0.2245539564\  
H,-0.773931202,-8.8850665382,-0.7384935366\H,0.2572178992,-8.892743616  
6,0.6682499613\H,-1.7165531034,-9.4536196807,2.1109590653\H,-2.7467402  
744,-9.445931699,0.7055550967\H,-1.4255076238,-11.3254620037,-0.272104  
3305\H,-0.3963740186,-11.3331398632,1.1318355331\H,-2.3639380648,-11.9  
189632501,2.5792901533\H,-3.4010548353,-11.9112197663,1.1644677135\H,-  
2.1283446766,-13.1088834366,1.3125239916\H,-1.9144454508,-4.8802983032  
,1.2005463077\H,-1.8492779101,-2.4761931748,1.1657846706\H,-1.01309814  
99,4.1643480305,0.5870282081\H,-0.5377852897,6.0270278893,-2.395431014  
\H,-1.3224852669,6.0936586954,-0.8240836353\H,1.6647458166,6.114402143  
5,-1.3626138448\H,0.2536158688,6.0838137006,1.3262594799\H,1.988348912  
7,5.995201633,1.0574855945\H,0.4216552923,8.2746472596,-1.6768280638\  
H,-0.1217679392,8.1955230371,-0.0261309464\H,2.2345667104,8.3580266051,  
0.7710198402\H,2.8026906313,8.3306416065,-0.8749757766\H,1.5898580005,  
10.4643063785,-1.3252348315\H,1.0036564549,10.4822444378,0.3139464412\  
H,2.9802333826,11.9732022765,0.0780138808\H,3.3611153284,10.6490330508  
,1.1630266627\H,3.9528038586,10.6279363341,-0.4881332809\Version=x86-  
Linux-G98RevA.9\HF=-1290.0277806\RMSD=7.062e-09\RMSF=3.494e-06\Dipole=  
-0.4840568,0.7108929,0.3839442\PG=C01 [X(C21H40B1003)]\@

**1[4] conformer B**

1\1\GINC-MONSTER\FOpt\RHF\6-31G(d)\C21H40B1003\PIOTR\27-Dec-2005\0\#\#P  
HF/6-31G\* FOPT GEOM(NOANGLE, NODISTANCE) FCHECK\1-(4-Pentyloxyphenyl  
) -12-(5-butylidiox[1,3]an-2-yl)-p-carborane C1, low diople 2\0,1\B,-1.  
5111798819,1.1497771758,1.522925881\B,-1.2348737939,2.246632156,0.1422  
30868\B,-1.7057561861,-0.508316736,0.8828046402\B,-1.2831451764,1.2753  
55434,-1.3544417075\B,-1.5645949494,-0.4305065035,-0.8989497764\B,0.06  
85257623,0.1294590235,-1.3005045511\B,-0.1972776774,-0.962054415,0.084  
323624\B,0.2659578459,1.7796848965,-0.6570962522\B,0.1248683006,1.7019  
895601,1.1241074831\B,-0.1600389437,0.0036156486,1.5830608396\C,0.8356  
202815,0.4139331001,0.2263301808\C,2.3377196031,0.2233979196,0.3374251  
129\C,3.1907504735,1.3246112578,0.449975029\C,4.5538693035,1.171267747  
,0.5517490685\C,5.123896329,-0.0989644398,0.5451739671\O,6.4641479046,

Supplementary Material (ESI) for Journal of Materials Chemistry  
This journal is © The Royal Society of Chemistry 2006

-0.1472116437, 0.6493798699\C, 7.1315632963, -1.3850217799, 0.6518762384\C, 8.6187381047, -1.1080142257, 0.7808623935\C, 9.4524230802, -2.3903171983, 0.7947290575\C, 10.9533102416, -2.1238315685, 0.92436374\C, 11.7865082998, -3.4046392809, 0.9382578631\C, 4.2967079067, -1.2032631903, 0.4347601639\C, 2.9217454081, -1.031761308, 0.3327842066\C, -2.25243184, 0.8662074621, 0.0013332448\C, -3.7550954735, 1.1493441318, -0.105254919\O, -4.4094258209, 0.5679889722, 0.9622498042\C, -5.7975063065, 0.7951525057, 0.9489955512\C, -6.4157666681, 0.3013780734, -0.357237375\C, -5.6033990258, 0.902343178, -1.5032489437\O, -4.2292066631, 0.6675607172, -1.308665809\C, -7.9084502663, 0.6398698081, -0.4258666287\C, -8.6475384474, 0.032268167, -1.6219169871\C, -10.1520122963, 0.3091793432, -1.5913594673\C, -10.8924011353, -0.290670386, -2.786002006\H, -2.1494080563, 1.5143672697, 2.4421705613\H, -1.7117480665, 3.3257180073, 0.1514804495\H, -2.4633389858, -1.2555175028, 1.3803291782\H, -1.7713429907, 1.7226598466, -2.3275122567\H, -2.2293731045, -1.1266338637, -1.5721919829\H, 0.7160362424, -0.2241317374, -2.2194759509\H, 0.2292219554, -2.0582575068, 0.070165796\H, 1.0273415429, 2.5196351901, -1.1670937022\H, 0.7919819563, 2.3896204999, 1.8092998584\H, 0.3373880278, -0.4327790842, 2.5582209479\H, 2.7889345306, 2.3187170291, 0.458801201\H, 5.1990652164, 2.0255072678, 0.6377373479\H, 6.7816832884, -1.9920233556, 1.482188228\H, 6.9203282667, -1.9207996226, -0.2693217715\H, 8.9242458643, -0.4716883033, -0.0446412727\H, 8.7867167568, -0.5423162744, 1.6927123485\H, 9.1303983006, -3.0258672887, 1.6181203898\H, 9.2677864141, -2.9553153689, -0.1175674366\H, 11.277666004, -1.490275025, 0.1019694163\H, 11.1404178488, -1.560750264, 1.8358786454\H, 11.5084317385, -4.0446871454, 1.7708205983\H, 11.64674006, -3.9736704073, 0.0234800832\H, 12.8450564287, -3.1831253731, 1.031047947\H, 4.6943969355, -2.1990787716, 0.425856176\H, 2.315205034, -1.9107363111, 0.2491536852\H, -3.9089423202, 2.2269144447, -0.0700718191\H, -6.1995829637, 0.2696406918, 1.8036151217\H, -5.9926313427, 1.8594344462, 1.0832008399\H, -6.2849298152, -0.7770980171, -0.3923652639\H, -5.7833347598, 1.9757527697, -1.5724123192\H, -5.8473459915, 0.4577722645, -2.4561416008\H, -8.3816270735, 0.2892366737, 0.4893869536\H, -8.035183434, 1.7216258451, -0.4350512289\H, -8.2380073178, 0.4204227438, -2.5516199089\H, -8.4802277632, -1.0430129647, -1.6391927675\H, -10.5718003379, -0.0880637994, -0.6698124768\H, -10.3200112507, 1.3837375524, -1.5649414379\H, -11.9558369416, -0.0796078188, -2.734612983\H, -10.5198537873, 0.1144501874, -3.7225519803\H, -10.7705711325, -1.3694783872, -2.8214507195\Version=x86-Linux-G98RevA.9\HF=-1290.0278395\RMSD=5.059e-09\RMSF=3.552e-06\Dipole=-0.7223315, -0.2187068, -0.085939\PG=C01 [X(C21H40B1003)]\@

**1[4] conformer C (syn)**

1\1\GINC-MASTER\FOpt\RHF\6-31G(d)\C21H40B1003\PIOTR\12-Mar-2006\0\#\P HF/6-31G\* FOPT GEOM(NOANGLE,NODISTANCE) FCHECK\1-(4-Pentyloxyphenyl)-12-(5-butyldiox[1,3]an-2-yl)-p-carborane, C syn\0,1\B, -1.1922237088, 1.5779882698, -0.5745565968\B, -1.1756492613, 1.5850882104, 1.2112355875\B, 0.5009260436, 1.5206172235, -1.1464560194\B, 0.5220973276, 1.5535554332, 1.7478270118\B, 1.5642248134, 1.5023979031, 0.2909167211\B, 1.2286066741, 0.025682356, 1.2074532307\B, 1.2100296881, 0.0041413989, -0.5788483757\B, -0.4600898345, 0.0726315712, 1.7752934694\B, -1.5168226962, 0.0950145037, 0.336764458\B, -0.4873895865, 0.0472828015, -1.119083472\C, -0.0284448839, -0.7762075226, 0.3340620197\C, -0.0399885665, -2.2943057251, 0.3490407948\C, -1.2190029848, -3.0196920315, 0.3633290434\C, -1.2274867779, -4.4089497622, 0.3772526503\C, -0.0319290024, -5.1065150009, 0.3772440238\O, 0.0781779393, -6.4471258979, 0.3901104034\C, -1.0737130021, -7.2536258481, 0.4039174369\C, -0.6228415802, -8.7033341557, 0.4153528143\C, -1.7993757666, -9.6805959595, 0.4309746477\C, -1.3573247866, -11.1451566219, 0.442572625\C, -2.5324274178, -12.1217676, 0.4581842941\C, 1.1637121085, -4.3933267669, 0.3629528663\C, 1.1555659498, -3.0179069389, 0.3490023347\C, 0.0662915744, 2.3511695365, 0.2984414781\C, 0.0623541447, 3.8838576576, 0.3188637563\O, -0.1247661916

Supplementary Material (ESI) for Journal of Materials Chemistry  
This journal is © The Royal Society of Chemistry 2006

, 4.3598796631, -0.963119483\C, -0.1620599161, 5.7649797228, -1.0386918189\  
C, 1.1145945981, 6.3657591249, -0.452510314\C, 1.3214454079, 5.7424718986, 0  
.9262537425\O, 1.2493645913, 4.3394481324, 0.8565116296\C, 1.0857697821, 7.  
8953853032, -0.3698825183\C, 1.0552913029, 8.6085358455, -1.7250515666\C, 1  
.133978139, 10.1310214188, -1.5950162362\C, 1.0980769018, 10.8467256019, -2  
.9447155662\H, -1.9982248379, 2.2110720719, -1.1531338465\H, -1.9632352615  
, 2.2422687232, 1.7940914736\H, 0.8243232442, 2.1052942174, -2.1125805462\H  
, 0.8553357498, 2.1713380751, 2.6926485864\H, 2.5898426166, 2.0747040241, 0.  
2758646695\H, 2.0255309648, -0.6018808333, 1.8059747676\H, 1.9964615666, -0  
.6375343292, -1.176445967\H, -0.777658902, -0.5290440626, 2.7376246529\H, -  
2.5594423112, -0.4496376993, 0.3501849071\H, -0.8253952508, -0.5775430783,  
-2.0593818627\H, -2.1645472322, -2.5160918689, 0.3636428393\H, -2.17064672  
84, -4.919084461, 0.387768078\H, -1.6702708428, -7.0312153565, 1.284241468\  
H, -1.6796046407, -7.0479645163, -0.4740920173\H, -0.0020205769, -8.8786675  
973, -0.4584494494\H, 0.0073114346, -8.8620221604, 1.2856533919\H, -2.42142  
21854, -9.4886701473, 1.303806481\H, -2.4307509803, -9.5052845288, -0.43864  
4156\H, -0.7369461288, -11.3396909906, -0.4293272087\H, -0.727610343, -11.3  
23094473, 1.3113217511\H, -3.1534357495, -11.9745124462, 1.3372868763\H, -3  
.1628374951, -11.9912362759, -0.4168572397\H, -2.187279095, -13.1508492908  
, 0.4661451091\H, 2.0891432649, -4.9382692842, 0.362809962\H, 2.0964531049,  
-2.5038552468, 0.337816443\H, -0.7621344748, 4.2210109035, 0.9454546241\H,  
-0.2840394018, 6.0017007373, -2.0847498777\H, -1.035921538, 6.13560122, -0.  
501658255\H, 1.9440564297, 6.0505556809, -1.0802661379\H, 0.570561798, 6.11  
03810214, 1.6259680884\H, 2.2974419991, 5.9770603608, 1.3270114218\H, 0.228  
2668606, 8.2106666657, 0.2231100499\H, 1.9672174697, 8.2255253436, 0.176538  
1316\H, 1.884997962, 8.256534369, -2.3351188748\H, 0.1473825219, 8.34877919  
21, -2.2644555053\H, 0.3101192279, 10.4828730036, -0.9777104808\H, 2.046731  
5011, 10.3998748744, -1.0678856671\H, 1.1577346326, 11.9232326481, -2.81956  
11152\H, 1.92919703, 10.5402015811, -3.5733649965\H, 0.1796452415, 10.62672  
73359, -3.4814900869\Version=x86-Linux-G98RevA.9\HF=-1290.0278308\RMSD  
=9.432e-09\RMSF=2.480e-06\Dipole=-0.5303901, 0.7046918, 0.0505721\PG=C01  
[X(C21H40B10O3)]\ \@

**1[4] conformer C (anti)**

1\1\GINC-MONSTER\FOpt\RHF\6-31G(d)\C21H40B10O3\PIOTR\20-Jan-2006\0\#\#P  
HF/6-31G\* FOPT GEOM(NOANGLE, NODISTANCE) FCHECK\1-(4-Pentyloxyphenyl  
) -12-(5-butylldiox[1,3]an-2-yl)-p-carborane C1\0,1\B, -1.3485541483, 1.5  
920553864, -0.8064069107\B, -1.3448028169, 1.5926036764, 0.9794914137\B, 0.  
3482875609, 1.5260806834, -1.366301707\B, 0.3487841142, 1.5484346075, 1.528  
1465928\B, 1.401068913, 1.4959615783, 0.0786033435\B, 1.0495784416, 0.01809  
28167, 0.9873050685\B, 1.0437581233, 0.003119624, -0.7991625537\B, -0.64283  
46858, 0.0736565587, 1.5431712459\B, -1.6889718543, 0.1078680061, 0.0971499  
798\B, -0.6494050844, 0.0589170313, -1.351442962\C, -0.2060837605, -0.77269  
42681, 0.1019767679\C, -0.2273209162, -2.290732724, 0.111369139\C, -1.41093  
44177, -3.008724801, 0.1150047514\C, -1.4282303627, -4.3979386255, 0.123844  
9539\C, -0.2371068197, -5.1030279278, 0.1294609467\O, -0.135502453, -6.4443  
36446, 0.1382441107\C, -1.2924981041, -7.2436042947, 0.1408653196\C, -0.850  
8336829, -8.6961599625, 0.1499204877\C, -2.033565282, -9.6660285235, 0.1535  
297388\C, -1.6008160316, -11.1333830943, 0.1626454224\C, -2.7821106045, -12  
.1026148698, 0.1662434742\C, 0.9630566736, -4.3973365845, 0.1259218084\C, 0  
.9636367188, -3.0218535769, 0.1168946525\C, -0.0915181567, 2.3541266091, 0.  
0784568207\C, -0.08610771, 3.8867201681, 0.1042781161\O, -0.2613872515, 4.3  
687071069, -1.1773881783\C, -0.2840781625, 5.7737079448, -1.2406863169\C, 0  
.9917411013, 6.3645371149, -0.6444713372\C, 1.185888328, 5.7352199367, 0.73  
41749121\O, 1.0998629672, 4.3326626092, 0.6516584147\C, 0.9304637314, 7.895  
0893764, -0.6121743177\C, 2.2346469879, 8.5784374574, -0.1901437919\C, 2.15  
78936174, 10.1042538126, -0.2740930679\C, 3.4554074313, 10.7901776003, 0.15  
15068839\H, -2.1463564548, 2.232305477, -1.388425298\H, -2.1324329023, 2.25

Supplementary Material (ESI) for Journal of Materials Chemistry  
This journal is © The Royal Society of Chemistry 2006

26338555,1.5590578369\H,0.6823576368,2.1122389,-2.3278860907\H,0.67911  
17518,2.1606885528,2.4775938736\H,2.4303601889,2.0618101571,0.07301553  
33\H,1.838269547,-0.6166038905,1.5892125031\H,1.8305040576,-0.64128827  
98,-1.3933960361\H,-0.9711020853,-0.529514512,2.5009674986\H,-2.735040  
5516,-0.4302709123,0.1010623349\H,-0.9845493166,-0.5604285585,-2.29637  
53424\H,-2.3532832457,-2.4991937132,0.1107058536\H,-2.3746356904,-4.90  
21376346,0.1260909002\H,-1.8938467896,-7.0207809515,1.017820737\H,-1.8  
908836967,-7.0308056017,-0.7405849166\H,-0.2249764297,-8.8720997271,-0  
.7201603052\H,-0.2278425571,-8.8621136733,1.0240155477\H,-2.6605438454  
, -9.4734797476,1.0226877181\H,-2.6576704074,-9.4834566968,-0.719834529  
5\H,-0.9755222682,-11.3285326227,-0.705598069\H,-0.9783899006,-11.3185  
698399,1.03512415\H,-3.4083848643,-11.954764377,1.0415021004\H,-3.4054  
826455,-11.9648078429,-0.7127156098\H,-2.4434981205,-13.1338760901,0.1  
727074056\H,1.8850212672,-4.9481095599,0.1301289278\H,1.907788377,-2.5  
137049246,0.114011606\H,-0.9129431887,4.2267973473,0.7261783602\H,-0.3  
908510644,6.029091614,-2.285472413\H,-1.1599619902,6.1470795316,-0.709  
4328482\H,1.8215094537,6.0464241669,-1.2703579953\H,0.4316870764,6.106  
1914422,1.4291162552\H,2.1595932129,5.9478935293,1.1486955843\H,0.6590  
347519,8.2480572245,-1.6052837386\H,0.1261889596,8.2121675627,0.050365  
0368\H,2.4932825689,8.2954625079,0.8275804656\H,3.0467972092,8.2240597  
954,-0.8220728248\H,1.9124641128,10.3961316407,-1.2928391644\H,1.34048  
50986,10.4586877043,0.3502687267\H,3.3704077699,11.8698036495,0.078916  
578\H,3.7092857102,10.5469292719,1.1793279261\H,4.2865368754,10.480844  
6158,-0.4757527915\\Version=x86-Linux-G98RevA.9\HF=-1290.0278314\RMSD=  
4.239e-09\RMSF=2.721e-06\Dipole=-0.5014528,0.7072214,0.0829819\PG=C01  
[X(C21H40B1003)]\@

**1[4] conformer D (syn)**

1\1\GINC-MONSTER\FOpt\RHF\6-31G(d)\C21H40B1003\PIOTR\26-Dec-2005\0\#\#P  
HF/6-31G\* FOPT GEOM(NOANGLE, NODISTANCE) FCHECK\1-(4-Pentyloxyphenyl  
) -12-(5-butylidiox[1,3]an-2-yl)-p-carborane C1, low diople\0,1\B,-2.16  
18110219,0.6405207905,-1.244594003\B,-1.0717900276,2.0552574276,-1.244  
0264367\B,-1.1680322643,-0.8275122366,-1.4777299876\B,0.5912808653,1.4  
709399098,-1.4972261681\B,0.5379139102,-0.3150802916,-1.6318713353\B,1  
.021597631,0.4572568505,-0.1143470548\B,-0.0683648863,-0.957912405,-0.  
1003140931\B,0.0301514776,1.9182330968,0.1289236848\B,-1.6722571938,1.  
4018462194,0.2770960995\B,-1.7349209431,-0.3755196321,0.1419523537\C,-  
0.3885776608,0.4223885309,0.8840002957\C,-0.1889132693,0.2799861806,2.  
3823315824\C,-1.0169660392,0.9264673062,3.3018499262\C,-0.8271369972,0.  
7913325261,4.6584260837\C,0.2049531763,-0.0004387398,5.152905838\O,0.  
3095786338,-0.069926043,6.4922387571\C,1.3210813515,-0.8459152897,7.08  
57928595\C,1.17537929,-0.7213799967,8.591887144\C,2.2302241682,-1.5295  
306676,9.3493257116\C,2.0934944168,-1.411824973,10.8685131323\C,3.1471  
225526,-2.2190578243,11.6255612015\C,1.0380498402,-0.6503183595,4.2577  
741584\C,0.8333861316,-0.5041025747,2.8923730337\C,-0.7470572471,0.671  
4347628,-2.2145570156\C,-0.9400088581,0.8534887259,-3.7242197946\O,-1.  
9200767249,-0.0104791759,-4.1699415298\C,-2.1716079919,0.1042533315,-5  
.5491088818\C,-0.8929417456,-0.1173997091,-6.3542044367\C,0.1813683541  
,0.7962967403,-5.7664457438\O,0.2589493956,0.6306297225,-4.3707637023\  
C,-1.1342024393,0.1100403469,-7.8500181399\C,0.048374946,-0.2570901426  
, -8.7515133299\C,-0.2747821366,-0.1135529096,-10.240144135\C,0.9043787  
435,-0.4735509509,-11.1430005199\H,-3.2279831607,0.7255008157,-1.73571  
82475\H,-1.4255479481,3.0579674907,-1.7551410436\H,-1.5738482677,-1.72  
7643823,-2.1140355877\H,1.3424469192,2.0923269883,-2.1567762721\H,1.26  
00725799,-0.8754745382,-2.369624842\H,2.0921113023,0.3939817297,0.3728  
228656\H,0.2735262494,-1.9704699344,0.3949667813\H,0.4404242635,2.8099  
938928,0.7811731345\H,-2.4124129304,1.9737807524,0.9901680224\H,-2.486  
0051812,-0.9911222762,0.8095893004\H,-1.8230130302,1.5452405199,2.9629



Supplementary Material (ESI) for Journal of Materials Chemistry  
This journal is © The Royal Society of Chemistry 2006

60628\H, -1.4709283265, 1.2935077293, 5.3561312732\H, 1.2217971154, -1.8824  
526758, 6.7759216668\H, 2.2962317871, -0.4904835142, 6.7647794265\H, 1.2447  
609846, 0.3289235906, 8.859754433\H, 0.1790198731, -1.0517868783, 8.8708062  
974\H, 2.1599427103, -2.5782203612, 9.0648846501\H, 3.2246755858, -1.198840  
359, 9.0538376658\H, 2.1648971353, -0.3651076099, 11.1552494716\H, 1.101254  
6208, -1.7430715311, 11.1662787327\H, 3.078819519, -3.2763148517, 11.385372  
1222\H, 4.15070945, -1.8876833347, 11.3742519808\H, 3.0241528369, -2.115541  
976, 12.6990440946\H, 1.845267309, -1.2699717958, 4.5958292588\H, 1.4975887  
344, -1.0220040036, 2.228709821\H, -1.258841938, 1.8776020625, -3.912818990  
5\H, -2.9232525998, -0.6362059653, -5.7835125188\H, -2.5883979838, 1.089104  
0541, -5.7615652986\H, -0.5773526554, -1.1442004027, -6.1882375179\H, -0.04  
04622984, 1.8387217361, -5.997765459\H, 1.1658263976, 0.5690398742, -6.1464  
096887\H, -1.9971815051, -0.480647013, -8.1514748389\H, -1.4075514603, 1.15  
06827672, -8.019384479\H, 0.9064726475, 0.3684280432, -8.5167116936\H, 0.35  
1666638, -1.2820762526, -8.5467225855\H, -1.1243696112, -0.7467992613, -10.  
486043818\H, -0.5868033731, 0.9085289047, -10.4440760727\H, 0.643675891, -0.  
.3642123217, -12.1909330484\H, 1.7593153349, 0.1671493045, -10.946452248\H  
, 1.2191366996, -1.5012521342, -10.985884692\Version=x86-Linux-G98RevA.9  
\HF=-1290.0278142\RMSD=4.154e-09\RMSF=3.459e-06\Dipole=0.2924159, -0.11  
93644, -0.7673615\PG=C01 [X(C21H40B1003)]\@

**1[4] conformer D (anti)**

1\1\GINC-MONSTER\FOpt\RHF\6-31G(d)\C21H40B1003\PIOTR\11-Mar-2006\0\#\#P  
HF/6-31G\* FOPT GEOM(NOANGLE,NODISTANCE) FCHECK\1-(4-Pentyloxyphenyl)  
-12-(5-butyldiox[1,3]an-2-yl)-p-carborane C1, second orien\0,1\B, -1.8  
919797049, 0.740116357, -1.2540825875\B, -0.785899756, 2.1422491725, -1.266  
0277216\B, -0.9172064234, -0.7395926159, -1.4933511225\B, 0.8680745794, 1.5  
384874343, -1.5329947689\B, 0.7930726003, -0.2470507728, -1.663727046\B, 1.  
299169413, 0.5224037634, -0.1521185704\B, 0.1932710217, -0.8801488003, -0.1  
25589567\B, 0.3267122747, 1.99514097, 0.0972482515\B, -1.3800514637, 1.4985  
413514, 0.2617123102\B, -1.4642467837, -0.2782497725, 0.1304859925\B, -0.10  
22697071, 0.5055449512, 0.858922466\B, 0.109228146, 0.363652466, 2.35567898  
96\B, -0.702542818, 1.0218753904, 3.2813616293\B, -0.5019926443, 0.88708427  
72, 4.6364291263\B, 0.5249485776, 0.0838848268, 5.1231375131\B, 0.640925549  
5, 0.0157469872, 6.4616034838\B, 1.6483650926, -0.7712524605, 7.0475279092\B  
C, 1.5178517074, -0.6421291757, 8.5546285402\B, 2.5697541835, -1.4614699633  
, 9.304096409\B, 2.4482461331, -1.339263722, 10.824222204\B, 3.4989473915, -  
2.1576632383, 11.5733073378\B, 1.3419904439, -0.577697381, 4.2218030847\B, 1.  
1266571118, -0.4316672231, 2.8580234089\B, -0.4857574011, 0.7530702268, -  
2.2367636022\B, -0.6899355908, 0.9346565867, -3.7450209343\B, -1.683377763  
1, 0.0810196156, -4.1802322855\B, -1.9546364562, 0.1935522773, -5.556879104  
8\B, -0.68477455, -0.0433579292, -6.372810408\B, 0.4038415788, 0.8591248516  
, -5.7959664002\B, 0.5007598884, 0.6973033698, -4.4020590758\B, -0.87028296  
65, 0.2029260611, -7.8735935202\B, -1.8193940302, -0.7770298494, -8.5699190  
375\B, -1.8911538547, -0.5583891557, -10.0825689129\B, -2.8415044573, -1.53  
04975193, -10.7804570949\H, -2.9614953933, 0.836388826, -1.7357895857\H, -1.  
.132742688, 3.1480059898, -1.7758967822\H, -1.3390437453, -1.6361824155, -2.  
.1242159927\H, 1.6203197615, 2.1500399887, -2.2004364642\H, 1.5020866239, -  
0.8169945717, -2.4068919375\H, 2.3732314793, 0.4478115721, 0.3255578508\H,  
0.5279535981, -1.8956460568, 0.3685800836\H, 0.7531081863, 2.883263812, 0.7  
440930142\H, -2.1072404137, 2.080086583, 0.980326141\H, -2.2163591537, -0.8  
840071235, 0.8059343297\H, -1.5041135033, 1.6497064426, 2.9485709179\H, -1.  
1332900733, 1.3983589693, 5.3389266928\H, 1.5338105402, -1.8071004946, 6.74  
06363608\H, 2.6247655581, -0.428199438, 6.7169890892\H, 1.6022684602, 0.407  
7685033, 8.8197563508\H, 0.5201710522, -0.9600044098, 8.8432212937\H, 2.484  
3131331, -2.5097740901, 9.0223968039\H, 3.5653785107, -1.1433136715, 8.9989  
556545\H, 2.5347988537, -0.2929402592, 11.1082099692\H, 1.454849204, -1.658  
0053336, 11.1316229008\H, 3.4157928273, -3.2144747921, 11.3358557695\H, 4.5

Supplementary Material (ESI) for Journal of Materials Chemistry  
This journal is © The Royal Society of Chemistry 2006

041127605, -1.8388398816, 11.3122596785\H, 3.3869793665, -2.0506538672, 12.6476513139\H, 2.1447749856, -1.2063387826, 4.5537637369\H, 1.7785527167, -0.9587570886, 2.1894107178\H, -0.9987233704, 1.9620084191, -3.9327150685\H, -2.7202643985, -0.5374297609, -5.7681345492\H, -2.3612164056, 1.1831720642, -5.7683460266\H, -0.3759501076, -1.0724123656, -6.2081060457\H, 0.1929108817, 1.9036925467, -6.026518084\H, 1.3771029235, 0.6163176464, -6.1985010707\H, -1.2221823728, 1.2212387756, -8.03342979\H, 0.10461972, 0.1426343523, -8.3536558872\H, -1.4944723642, -1.7961443713, -8.3690608786\H, -2.8204759751, -0.6877757996, -8.1544847966\H, -2.2071119636, 0.4629215589, -10.2842992897\H, -0.8950277859, -0.6592723178, -10.5078122141\H, -2.8688793902, -1.3519719244, -11.8507224555\H, -2.5331212026, -2.5603234228, -10.6246251462\H, -3.8547463617, -1.4286248146, -10.4023070548\\Version=x86-Linux-G98Rev A.9\HF=-1290.0278144\RMSD=7.589e-09\RMSF=2.471e-06\Dipole=0.244015, -0.135667, -0.765564\PG=C01 [X(C21H40B1003)]\@

**1[4] conformer E (syn)**

1\1\GINC-MONSTER\FOpt\RHF\6-31G(d)\C21H40B1003\PIOTR\13-Mar-2006\0\#\P HF/6-31G\* FOPT GEOM(NOANGLE,NODISTANCE) FCHECK\1-(4-Pentyloxyphenyl)-12-(5-butyldiox[1,3]an-2-yl)-p-carborane C1, E syn\0,1\B, -0.8150335359, 1.63460455, -0.7209614215\B, -1.107945316, 0.4773025708, -2.0478396899\B, -1.4314990183, 0.9098054945, 0.7975577046\B, -1.9180079428, -0.952287529, -1.3614050998\B, -2.1121314179, -0.6911553533, 0.4018763094\B, -0.805110992, -1.7080856758, -0.2167807189\B, -0.496356495, -0.5624718502, 1.1146098523\B, -0.1808117025, -0.9930811992, -1.7267566556\B, 0.4961917219, 0.6087595613, -1.3302441396\B, 0.2979653531, 0.8760845688, 0.4252363708\C, 0.6007455374, -0.7004883706, -0.2143612464\C, 1.9690569366, -1.3104925072, 0.0325581426\C, 2.1356169381, -2.6752480933, 0.275202969\C, 3.3805248819, -3.2182485743, 0.4985792578\C, 4.5156877666, -2.4132677388, 0.4888854969\O, 5.6861353847, -3.0358201218, 0.7172414909\C, 6.8879611597, -2.3057526315, 0.7283456057\C, 8.0178991366, -3.2798694574, 1.0101315002\C, 9.384610183, -2.5940816332, 1.0463645323\C, 10.5316047142, -3.5659995325, 1.3296677523\C, 11.8971422836, -2.8812584903, 1.3659434854\C, 4.3723940329, -1.0566122314, 0.2512113476\C, 3.1098297375, -0.5240627289, 0.0274479377\C, -2.1937037791, 0.614079694, -0.7185741152\C, -3.5467654682, 1.2655479539, -1.0258512648\O, -3.6842846383, 2.4150923422, -0.2743032892\C, -4.8949617932, 3.0944846841, -0.5069116004\C, -6.0843032102, 2.1707418076, -0.2489392595\C, -5.8406910721, 0.882839826, -1.0326545524\O, -4.560618016, 0.3669461111, -0.7610206313\C, -7.4330690498, 2.7967624326, -0.6181838121\C, -7.8381206647, 3.9970001914, 0.2428377114\C, -9.2358602134, 4.5214951438, -0.0922627602\C, -9.6415912989, 5.7227467421, 0.7607238262\H, -0.9243563808, 2.7904041229, -0.9145835348\H, -1.4293987649, 0.8800780569, -3.1091227366\H, -1.9372967986, 1.5873807214, 1.6129614909\H, -2.7582240554, -1.5065824326, -1.9714098668\H, -3.0723245831, -1.0838608593, 0.9526482455\H, -0.7363099435, -2.8682886324, -0.036932275\H, -0.1759314194, -0.9613632177, 2.1763402619\H, 0.3408373799, -1.6742844195, -2.5347293065\H, 1.4581747741, 0.9940416601, -1.8901741059\H, 1.1336536836, 1.4344665068, 1.039434902\H, 1.2876699841, -3.3295266792, 0.2921594474\H, 3.4961070904, -4.2697559429, 0.6840772648\H, 7.033302065, -1.8181090631, -0.2315516577\H, 6.8460556263, -1.5361346006, 1.4940044618\H, 7.8208148438, -3.7723107109, 1.9579446091\H, 8.0065426389, -4.0520249103, 0.2463590093\H, 9.5670535474, -2.0939203221, 0.0965409378\H, 9.3814898603, -1.8144768886, 1.8065004873\H, 10.3523128706, -4.0658057818, 2.2788628952\H, 10.5376784454, -4.3449826559, 0.5706689424\H, 12.1203418132, -2.4003886804, 0.4177332955\H, 11.9335343272, -2.1190577947, 2.1391678743\H, 12.688970536, -3.5954990473, 1.5685994616\H, 5.2202405506, -0.4002735409, 0.2357555296\H, 3.036490533, 0.5305633174, -0.1522530941\H, -3.5740511484, 1.5281680001, -2.0824175014\H, -4.8871464295, 3.9475122471, 0.1544877595\H, -4.9158276861, 3.4603651631, -1.5340902173\H, -6.0784530463, 1.9152389939, 0.80752633\H, -5.9391538903, 1.0651645238, -2.1030959105\H, -6.5444405661, 0.1100345254, -0.757

Supplementary Material (ESI) for Journal of Materials Chemistry  
This journal is © The Royal Society of Chemistry 2006

4962436\H,-7.4211155494,3.0923562713,-1.6664363067\H,-8.2015565081,2.0  
31125784,-0.5301985404\H,-7.8026283085,3.7140914008,1.2931731111\H,-7.  
1210191802,4.8052570024,0.1194612782\H,-9.2749534992,4.795973105,-1.14  
42802432\H,-9.9612368233,3.722024265,0.0416733191\H,-10.6368377845,6.0  
696710535,0.5014618575\H,-9.6439428261,5.4705775733,1.8172863902\H,-8.  
9552710457,6.5531306285,0.6211735334\\Version=x86-Linux-G98RevA.9\HF=-  
1290.0277798\RMSD=5.941e-09\RMSF=2.528e-06\Dipole=-0.3883696,0.7764904  
, -0.2745952\PG=C01 [X(C21H40B1003)]\@

**1[4] conformer E (anti)**

1\1\GINC-MONSTER\FOpt\RHF\6-31G(d)\C21H40B1003\PIOTR\26-Dec-2005\0\#\#P  
HF/6-31G\* FOPT GEOM(NOANGLE, NODISTANCE) FCHECK\1-(4-Pentyloxyphenyl  
) -12-(5-butyl)diox[1,3]an-2-yl)-p-carborane C1, high dipole\0,1\B,-0.7  
205093936,1.8900722869,-0.6462302222\B,-1.0008098274,0.7406251569,-1.9  
826406295\B,-1.3335837177,1.1481562282,0.8653797348\B,-1.7997269546,-0  
.7012438161,-1.3089686108\B,-1.9995216165,-0.4555097217,0.4558805362\B  
, -0.682515131,-1.4562142805,-0.1680019678\B,-0.38633045,-0.3183989366,  
1.1728893055\B,-0.0615470476,-0.7241040369,-1.6711480562\B,0.600755233  
4,0.8804019137,-1.2608630809\B,0.3968085934,1.1322933011,0.4962536116\  
C,0.7145180285,-0.436535305,-0.1549670966\C,2.0876129135,-1.0365613392  
,0.0898732558\C,2.2656350799,-2.4017567299,0.3216501599\C,3.5147941865  
, -2.9356626283,0.5431937635\C,4.6428779145,-2.1207364156,0.5424991543\  
O,5.8182611451,-2.7348730914,0.7682860879\C,7.0137522539,-1.9946185356  
,0.7867557491\C,8.151670624,-2.9611753496,1.0623635801\C,9.5123868974,  
-2.2639850719,1.1058892972\C,10.6673350737,-3.2282287799,1.3830012666\  
C,12.0268728887,-2.5320806673,1.426600886\C,4.4881850152,-0.763484407,  
0.315622944\C,3.2214540014,-0.2401697467,0.0935643342\C,-2.0902653659,  
0.8576356609,-0.6545450907\C,-3.4482435229,1.4999452772,-0.9594017666\  
O,-3.5973041208,2.642520145,-0.1990725142\C,-4.8163602703,3.3048807492  
, -0.4308966221\C,-5.9979760592,2.3699156244,-0.1821990668\C,-5.7423456  
76,1.0894598128,-0.9756081047\O,-4.4545106751,0.5905942054,-0.70360695  
34\C,-7.325255535,3.0496302141,-0.5339472918\C,-8.5742319029,2.2489339  
011,-0.1532767434\C,-9.872472465,3.0110097674,-0.4269140988\C,-11.1213  
134091,2.213402913,-0.0535697349\H,-0.8395417881,3.0463340551,-0.83108  
53835\H,-1.3236713457,1.1488574568,-3.0414029512\H,-1.8468717278,1.814  
9488924,1.6849889714\H,-2.6339017197,-1.2580736741,-1.9249464102\H,-2.  
9573145808,-0.8608179304,1.0016768315\H,-0.6040333718,-2.6171524403,0.  
0029798349\H,-0.0644652238,-0.7227686915,2.2321217901\H,0.4675566351,-  
1.3944887573,-2.4833223884\H,1.5604697222,1.2783600187,-1.8157964926\H  
,1.226412156,1.6931259085,1.1164230962\H,1.4234310417,-3.0635671909,0.  
331437289\H,3.6392154134,-3.9876158609,0.7203084968\H,7.1560979046,-1.  
4981621271,-0.1690636078\H,6.9642680889,-1.231454191,1.5584224995\H,7.  
9576119326,-3.4628108877,2.0059834015\H,8.1479580053,-3.7273408278,0.2  
924922027\H,9.6917172899,-1.7547317548,0.1603058244\H,9.5015767477,-1.  
4905106197,1.8721950659\H,10.4911188713,-3.7371263236,2.3279265718\H,1  
0.681106331,-4.0010432331,0.6178241525\H,12.2471764193,-2.0417781003,0.  
.4825605592\H,12.0557061798,-1.7757832439,2.2059220607\H,12.824559582,  
-3.2410779874,1.6246468825\H,5.3302665983,-0.0996274682,0.307380703\H,  
3.1392365166,0.8152144597,-0.077647038\H,-3.4756287787,1.7708273015,-2  
.0138636222\H,-4.8327399914,4.1539510946,0.2377208229\H,-4.8372300587,  
3.6794183548,-1.4546495813\H,-5.9907393557,2.1092397608,0.8729965773\H  
, -5.8405947872,1.2807648144,-2.0447766536\H,-6.4278037849,0.2988825117  
, -0.7104293735\H,-7.3619876645,4.0121510574,-0.0272757974\H,-7.3488634  
005,3.2695935676,-1.6004442093\H,-8.5972282237,1.3088764506,-0.6996103  
031\H,-8.5260759153,1.9883152138,0.9023089288\H,-9.8630420905,3.947268  
4075,0.1267956625\H,-9.9172107074,3.2797992958,-1.4801910747\H,-12.024  
1921493,2.7804073803,-0.2569599136\H,-11.1786788299,1.2868829799,-0.61  
77794208\H,-11.1221232023,1.9574781166,1.0020872844\\Version=x86-Linux

Supplementary Material (ESI) for Journal of Materials Chemistry  
This journal is © The Royal Society of Chemistry 2006

-G98RevA.9\HF=-1290.0277808\RMSD=4.168e-09\RMSF=5.002e-06\Dipole=-0.4102041,0.7377338,-0.2790671\PG=C01 [X(C21H40B10O3)]\ \@

**1[4] conformer F (syn)**

1\1\GINC-MONSTER\FOpt\RHF\6-31G(d)\C21H40B10O3\PIOTR\19-Jan-2006\0\ \#P  
HF/6-31G\* FOPT GEOM(NOANGLE, NODISTANCE) FCHECK\1-(4-Pentyloxyphenyl)-12-(5-butyldiox[1,3]an-2-yl)-p-carborane C1\0,1\B,-1.785523075,1.4595150449,-0.9767078991\B,-1.8163457102,1.5008035431,0.8075286746\B,-0.0739158445,1.5016366217,-1.5060512285\B,-0.1337824971,1.5855536559,1.3843981847\B,0.9478896304,1.5777102468,-0.0455842978\B,0.6840965885,0.1004237659,0.8889648935\B,0.7195409881,0.0399990768,-0.8930148209\B,-1.0184290078,0.0464653921,1.4176432841\B,-2.0388499975,-0.0264280515,-0.0433573968\B,-0.9646112329,-0.027032368,-1.471359768\C,-0.4985859742,-0.7980702975,0.0031642685\C,-0.4702998931,-2.3159349545,0.0255986517\C,0.4907812374,-3.0221890315,0.7284372478\C,0.5153738721,-4.4112168905,0.7471756564\C,-0.4404332921,-5.1279958808,0.0481764679\O,-0.5121736999,-6.470359841,-0.0035802951\C,0.4282310585,-7.258162789,0.683908548\C,0.083307986,-8.7151252437,0.4320243009\C,1.0458736537,-9.6731760977,1.1357190527\C,0.7083044687,-11.1448379686,0.8891899968\C,1.6697231934,-12.1022128588,1.5920464198\C,-1.4140444169,-4.434152162,-0.6652583079\C,-1.4251496912,-3.058684361,-0.6739619278\C,-0.601698354,2.3278183886,-0.0897433429\C,-0.7034096494,3.8572476347,-0.0989812806\O,-0.8841139522,4.2980190174,-1.3946336047\C,-1.0036769837,5.6962456038,-1.4905965834\C,0.2145334577,6.3880774345,-0.88265249\C,0.4224022564,5.8037160386,0.5136714424\O,0.436441353,4.3971267553,0.4617001056\C,0.0456974109,7.9108612638,-0.8866766549\C,1.289472224,8.6932309249,-0.4543675161\C,1.1080527671,10.207701808,-0.5748638277\C,2.3449049249,10.9922534337,-0.1391518283\H,-2.611534473,2.0291599165,-1.591844358\H,-2.6570944391,2.1175417845,1.3594544273\H,0.2298988507,2.0885216492,-2.4771522883\H,0.1375259688,2.2386583329,2.3252745142\H,1.9347807259,2.2146246179,-0.0402574281\H,1.5195528709,-0.4317750463,1.523318108\H,1.5585974008,-0.5742238901,-1.4477546291\H,-1.3210810712,-0.5572509904,2.3834978825\H,-3.027433938,-0.6666381584,-0.0372242005\H,-1.2338527007,-0.6755626527,-2.416972098\H,1.247818718,-2.503239941,1.2808759342\H,1.2832450012,-4.9059967933,1.308812413\H,1.4295317565,-7.0343817967,0.3267175304\H,0.3919008125,-7.0341749384,1.7463565903\H,-0.9340371958,-8.8922516841,0.7686741715\H,0.095207481,-8.892452739,-0.6394699218\H,2.063496246,-9.4794486134,0.8002945457\H,1.0352362351,-9.4792519927,2.2071138069\H,-0.3074189575,-11.3411580328,1.2248918055\H,0.7198005356,-11.3413509841,-0.1804708369\H,2.6905796357,-11.9532207622,1.2517478597\H,1.6554097727,-11.953024715,2.6680080593\H,1.4046411982,-13.1368389265,1.3984348478\H,-2.1532307062,-4.9941378654,-1.206954111\H,-2.1901763816,-2.5598718519,-1.2357778628\H,-1.5651711871,4.1517938042,0.4982094061\H,-1.1054535697,5.9209821033,-2.54289479\H,-1.9147985589,6.0183406117,-0.9857162104\H,1.0778306081,6.1157957264,-1.4843419977\H,-0.3707000073,6.1355516878,1.184681808\H,1.3696933967,6.0932602072,0.9425970502\H,-0.2282247122,8.2224456054,-1.8928578826\H,-0.7929126356,8.1846870301,-0.247848915\H,1.5451837022,8.4511181436,0.574579959\H,2.1378973523,8.3833925254,-1.0615635035\H,0.864932099,10.4596051207,-1.6047676856\H,0.2545349162,10.5170623424,0.0246398455\H,2.1862136261,12.061405901,-0.2382218344\H,2.5928503094,10.7896474029,0.898885221\H,3.2090209604,10.7287717987,-0.7423130695\Version=x86-Linux-G98RevA.9\HF=-1290.0278181\RMSD=3.471e-09\RMSF=7.618e-06\Dipole=0.24896,0.7089321,0.3263155\PG=C01 [X(C21H40B10O3)]\ \@

**1[4] conformer F (anti)**

1\1\GINC-MASTER\FOpt\RHF\6-31G(d)\C21H40B10O3\PIOTR\13-Mar-2006\0\ \#P  
HF/6-31G\* FOPT GEOM(NOANGLE, NODISTANCE) FCHECK\1-(4-Pentyloxyphenyl)-

Supplementary Material (ESI) for Journal of Materials Chemistry  
This journal is © The Royal Society of Chemistry 2006

12-(5-butylldiox[1,3]an-2-yl)-p-carborane, F anti\0,1\B,-1.6359929423, 1.459169056,-0.7359838319\B,-1.6497467218,1.5095467901,1.048227881\B,0.0701392396,1.5078054294,-1.2821891957\B,0.0378546045,1.606374039,1.6082675248\B,1.1056161513,1.5969679906,0.1678736555\B,0.8589279392,0.1231049324,1.1124858832\B,0.8774502497,0.0536964841,-0.6694249543\B,-0.8380543309,0.0627392642,1.6580081361\B,-1.8721610766,-0.0232604323,0.2073900467\B,-0.8118408529,-0.0254634583,-1.2309964872\C,-0.3273743017,-0.7863080219,0.2428341625\C,-0.2903035786,-2.3038361605,0.272890734\C,0.6819162856,-3.0009955575,0.9694945657\C,0.714513368,-4.3897080572,0.9951732552\C,-0.2443141464,-5.1155501586,0.309749372\O,-0.3089547189,-6.4584928001,0.2658111643\C,0.6430113197,-7.2373667123,0.9474564686\C,0.3037260215,-8.6974674907,0.7065005352\C,1.2789371738,-9.6464631823,1.4049916194\C,0.9471270421,-11.1212049431,1.1693656411\C,1.9211656116,-12.0695798397,1.8670143174\C,-1.2290774339,-4.4309460586,-0.3972535675\C,-1.2480125484,-3.0556029593,-0.4129658089\C,-0.4483971998,2.3384479192,0.1349340712\C,-0.5584245217,3.8672550286,0.1190022921\O,-0.7531457521,4.300209942,-1.1770195954\C,-0.8864179241,5.6972282661,-1.2864740525\C,0.3339065423,6.3986131542,-0.6921211331\C,0.5568026681,5.8222599523,0.704448187\O,0.5835615904,4.4164109294,0.6667195035\C,0.1974450693,7.923960288,-0.6461935466\C,0.1437263519,8.6027717372,-2.0181720389\C,0.1140723015,10.129561672,-1.9227983402\C,0.0546684049,10.8106600721,-3.2894677719\H,-2.471045372,2.0211584597,-1.3459635162\H,-2.4884946086,2.1245824519,1.6050756975\H,0.3612768022,2.091227989,-2.2592393295\H,0.3147506567,2.2658020589,2.5430657349\H,2.0889834988,2.2392886281,0.1603634691\H,1.7033359712,-0.4013681961,1.7413979725\H,1.7144093065,-0.5588879779,-1.2291227828\H,-1.128002634,-0.5376353794,2.6298210107\H,-2.8571896808,-0.6686764409,0.2263789424\H,-1.0867763147,-0.6803158645,-2.1705986094\H,1.4416546695,-2.4749682449,1.5114426375\H,1.4908349136,-4.8773097908,1.5514674421\H,1.6393066882,-7.0098665835,0.5787698928\H,0.6164716575,-7.0082516286,2.0091125981\H,-0.7090689754,-8.8785409609,1.0545879437\H,0.3055368692,-8.8801528325,-0.3641617015\H,2.2919232748,-9.4487523485,1.0580518921\H,1.2782914181,-9.4471519993,2.4754507146\H,-0.0639428295,-11.3214956764,1.5165753964\H,0.9486623176,-11.3230895252,0.1006438908\H,2.9375868268,-11.9166089917,1.5153939803\H,1.9171444656,-11.9150033454,2.9423024153\H,1.6599359299,-13.1066406791,1.6813633388\H,-1.9706644946,-4.9977242975,-0.9284857052\H,-2.021529271,-2.564031486,-0.9695121657\H,-1.4162248646,4.160206052,0.7226463702\H,-1.004262161,5.9013983399,-2.3398392843\H,-1.7941174031,6.017844003,-0.7739607325\H,1.1952171097,6.1281203863,-1.2974469393\H,-0.2311629876,6.1524565422,1.3818412214\H,1.5062602433,6.1333174778,1.1167567655\H,-0.6911546073,8.1917873091,-0.0760995272\H,1.0431533424,8.3269624915,-0.0922116138\H,1.0074710962,8.2959916745,-2.6049729946\H,-0.7333960261,8.2682828451,-2.5672557373\H,-0.7439783686,10.4367550734,-1.3286721101\H,0.9956273701,10.4731926696,-1.3860916878\H,0.0370626197,11.8912334694,-3.1887656731\H,0.9170346742,10.5489240514,-3.895883053\H,-0.835750413,10.5151415416,-3.8370618052\Version=x86-Linux-G98RevA.9\HF=-1290.0278185\RMSD=4.868e-09\RMSF=2.465e-06\Dipole=0.2242145,0.7098069,0.2861259\PG=C01 [X(C21H40B10O3)]\@

## 9. References

- (1) Dunmur, D.; Toriyama, K. In *Handbook of Liquid Crystals*; Demus, D., Goodby, J., Gray, G. W., Spiess, H.-W., Vill, V., Eds.; Wiley-VCH: New York, 1998; Vol. 1, p 215-230.

- (2) Ohtsuka, T.; Ohnishi, H.; Takatsu, H. in *Physical Properties of Liquid Crystals: Nematics*, D. A. Dunmur, A. Fukuda, and G. R. Luckhurst, Eds; IEE, London, 2001, pp 515-522.
- (3) Urban, S.; Kedzierski, J.; Dabrowski, R. *Z. Naturforsch.* **2000**, *55A*, 449-456.
- (4) Urban, S. in *Physical Properties of Liquid Crystals: Nematics*, D. A. Dunmur, A. Fukuda, and G. R. Luckhurst, Eds; IEE, London, 2001, pp 267-276.
- (5) Raszewski, Z.; Dabrowski, R.; Stolarzowa, Z.; Zmija, J. *Cryst. Res. Technol.* **1987**, *22*, 835-844.
- (6) Dunmur, D.; Toriyama, K. In *Handbook of Liquid Crystals*; Demus, D., Goodby, J., Gray, G. W., Spiess, H.-W., Vill, V., Eds.; Wiley-VCH: New York, 1998; Vol. 1, p 231-252.
- (7) Gaussian 98, Revision A.9, M. J. Frisch, G. W. Trucks, H. B. Schlegel, G. E. Scuseria, M. A. Robb, J. R. Cheeseman, V. G. Zakrzewski, J. A. Montgomery, Jr., R. E. Stratmann, J. C. Burant, S. Dapprich, J. M. Millam, A. D. Daniels, K. N. Kudin, M. C. Strain, O. Farkas, J. Tomasi, V. Barone, M. Cossi, R. Cammi, B. Mennucci, C. Pomelli, C. Adamo, S. Clifford, J. Ochterski, G. A. Petersson, P. Y. Ayala, Q. Cui, K. Morokuma, D. K. Malick, A. D. Rabuck, K. Raghavachari, J. B. Foresman, J. Cioslowski, J. V. Ortiz, A. G. Baboul, B. B. Stefanov, G. Liu, A. Liashenko, P. Piskorz, I. Komaromi, R. Gomperts, R. L. Martin, D. J. Fox, T. Keith, M. A. Al-Laham, C. Y. Peng, A. Nanayakkara, M. Challacombe, P. M. W. Gill, B. Johnson, W. Chen, M. W. Wong, J. L. Andres, C. Gonzalez, M. Head-Gordon, E. S. Replogle, and J. A. Pople, Gaussian, Inc., Pittsburgh PA, 1998.
- (8) Ohta, K.; Januszko, A.; Kaszynski, P.; Nagamine, T.; Sasnouski, G.; Endo, Y. *Liq. Cryst.* **2004**, *31*, 671-682.
- (9) Alagui, A.; Apparau, M.; Pasqualini, R.; Vidal, M. *Bull. Soc. Chim. Fr.* **1991**, *128*, 286-295.
- (10) Adkins, H.; Billica, H. R. *J. Am. Chem. Soc.* **1948**, *70*, 3121-3125.
- (11) Ludwig, B. J.; Powell, L. S.; Berger, F. M. *J. Med. Chem.* **1969**, *12*, 462-472.
- (12) Dong, C. C.; Styring, P.; Goodby, J. W.; Chan, L. K. M. *J. Mater. Chem.* **1999**, *9*, 1669-1677.
- (13) Vorbrodtt, H.-M.; Deresch, S.; Kresse, H.; Wiegeleben, A.; Demus, D.; Zschke, H. *J. Prakt. Chem.* **1981**, *323*, 902-913.
- (14) Skarzewski, J.; Mlochowski, J. *Tetrahedron*, **1983**, *39*, 309-312.
- (15) Guanti, G.; Narisano, E.; Podgorski, T.; Thea, S.; Williams, A. *Tetrahedron*, **1990**, *46*, 7081-7092.
- (16) Choi, Y. M.; Kucharczyk, N.; Sofia, R. D. *Tetrahedron*, **1986**, *42*, 6399-6404.
- (17) Haramoto, Y.; Akazawa, K.; Kamogawa, H. *Bull. Chem. Soc. Jpn.* **1984**, *57*, 3173-3176.
- (18) Sun, G.-X.; Chen, B.; Tang, H.; Xu, S.-Y. *J. Mater. Chem.* **2003**, *13*, 742-748.
- (19) Schubert, H., von.; Zschke, H. *J. Prakt. Chem.* **1970**, *312*, 494-506.
